# Supplementary material for: Pseudobulbiferamides: Plasmid-Encoded Ureidopeptide Natural Products with Biosynthetic Gene Clusters Shared Among Marine Bacteria of Different Genera
Source: PubMed Central journal article supplement (PMC10616845; doi:10.1021/acs.jnatprod.3c00595), 2023-09-15
Supplement: np3c00595_si_001.pdf [file np3c00595_si_001.pdf]

SUPPLEMENTARY INFORMATION FOR:

**Pseudobulbiferamides: plasmid-encoded ureidopeptide natural products with biosynthetic gene clusters shared among marine bacteria of different genera**

Weimao Zhong,<sup>1</sup> Nicole M. Aiosa,<sup>1,†</sup> Jessica M. Deutsch,<sup>1,†</sup> Neha Garg,<sup>1,2</sup> and Vinayak Agarwal<sup>1,3,\*</sup>

<sup>1</sup>School of Chemistry and Biochemistry, Georgia Institute of Technology, Atlanta, GA 30332, USA

<sup>2</sup>Center for Microbial Dynamics and Infection, Georgia Institute of Technology, Atlanta, GA, 30332, USA

<sup>3</sup>School of Biological Sciences, Georgia Institute of Technology, Atlanta, GA 30332, USA

<sup>†</sup>Equal contribution authors

\*Correspondence: [vagarwal@gatech.edu](mailto:vagarwal@gatech.edu); Ph: (+1)404-385-3798

**TABLE OF CONTENTS**

Table S1–S2

Figures S1–S45

Supplementary references

SUPPLEMENTARY TABLES

**Table S1.**  $^{13}\text{C}$  (176 MHz) and  $^1\text{H}$  (700 MHz) NMR data of compounds **6** and **9** in  $\text{DMSO-}d_6$  ( $J$  in Hz,  $\delta$  in ppm).

|                     |                   | <b>6</b>                                |                                                        | <b>9</b>                                |                                              |
|---------------------|-------------------|-----------------------------------------|--------------------------------------------------------|-----------------------------------------|----------------------------------------------|
| Residue             | No.               | $\delta_{\text{C}}$ , type <sup>a</sup> | $\delta_{\text{H}}$ ( $J$ , Hz) <sup>b</sup>           | $\delta_{\text{C}}$ , type <sup>a</sup> | $\delta_{\text{H}}$ ( $J$ , Hz) <sup>b</sup> |
| Phe <sup>1</sup>    | 1                 | 173.8, C                                |                                                        | 173.5, C                                |                                              |
|                     | 2                 | 54.6, CH                                | 4.39, br s                                             | 53.8, CH                                | 4.39, ddd (7.8, 7.5, 5.3)                    |
|                     | 3                 | 37.7, CH <sub>2</sub>                   | 3.04, dd (13.7, 5.3)<br>2.89, ddd (13.7, 7.5)          | 37.5, CH <sub>2</sub>                   | 3.04, dd (13.7, 5.3)<br>2.89, dd (13.7, 7.5) |
|                     | 4                 | 137.8, C                                |                                                        | 137.2, C                                |                                              |
|                     | 5/9               | 129.4, CH                               | 7.16, d (7.3)                                          | 129.3, CH                               | 7.20, d (7.6)                                |
|                     | 6/8               | 128.1, CH                               | 7.27, t (7.6)                                          | 128.2, CH                               | 7.28, t (7.6)                                |
|                     | 7                 | 126.4, CH                               | 7.21, t (7.3)                                          | 126.5, CH                               | 7.22, t (7.4)                                |
|                     | NH                |                                         | 6.47, br s                                             |                                         | 6.44, d (8.1)                                |
| Ureido              | CO                | nd                                      |                                                        | 154.6, C                                |                                              |
| Dhb <sup>2</sup>    | 1                 | 165.5, C                                |                                                        | 166.3, C                                |                                              |
|                     | 2                 | 132.4, C                                |                                                        | 119.5, C                                |                                              |
|                     | 3                 | 121.3, CH                               | 5.90, q (7.4)                                          | 127.8, CH                               | 6.30, q (7.1)                                |
|                     | 4                 | 12.2, CH <sub>3</sub>                   | 1.61, d (7.0)                                          | 13.7, CH <sub>3</sub>                   | 1.58, d (7.1)                                |
|                     | NH                |                                         | 7.90, q                                                |                                         | 7.58, s                                      |
| Gly <sup>3</sup>    | 1                 | 169.2, C                                |                                                        |                                         |                                              |
|                     | 2                 | 42.3, CH <sub>2</sub>                   | 3.73, overlap<br>3.63, dd (17.4, 6.3)<br>8.08, t (6.1) |                                         |                                              |
| Arg <sup>4</sup>    | NH                |                                         |                                                        |                                         |                                              |
|                     | 1                 | 170.5, C                                |                                                        |                                         |                                              |
|                     | 2                 | 50.2, CH                                | 4.53, m                                                |                                         |                                              |
|                     | 3                 | 28.1, CH <sub>2</sub>                   | 1.74, m<br>1.65, m                                     |                                         |                                              |
|                     | 4                 | 24.7, CH <sub>2</sub>                   | 1.55, m<br>1.53, m                                     |                                         |                                              |
|                     | 5                 | 40.5, CH <sub>2</sub>                   | 3.08, m                                                |                                         |                                              |
|                     | 6                 | 156.7, C                                |                                                        |                                         |                                              |
|                     | $\alpha\text{NH}$ |                                         | 8.11, d (7.5)                                          |                                         |                                              |
| $\delta\text{NH}$   |                   | nd                                      |                                                        |                                         |                                              |
| $\epsilon\text{NH}$ |                   | nd                                      |                                                        |                                         |                                              |
| Pro <sup>5</sup> -  | 1                 | 173.5, C                                |                                                        |                                         |                                              |
| Thz <sup>6</sup>    | 2                 | 58.3, CH                                | 5.30, dd (8.1, 2.5)                                    |                                         |                                              |
|                     | 3                 | 31.4, CH <sub>2</sub>                   | 2.20, m<br>2.11, m                                     |                                         |                                              |
|                     | 4                 | 24.0, CH <sub>2</sub>                   | 2.00, m<br>1.93, m                                     |                                         |                                              |
|                     | 5                 | 46.8, CH <sub>2</sub>                   | 3.08, overlap                                          |                                         |                                              |
|                     | 1'                | 168.5, C                                |                                                        |                                         |                                              |
|                     | 2'                | 149.0, C                                |                                                        |                                         |                                              |
|                     | 3'                | 128.3, CH                               | 8.27, s                                                |                                         |                                              |

<sup>a</sup>Recorded at 176 MHz. <sup>b</sup>Recorded at 700 MHz. <sup>nd</sup>Not detected.

**Table S2.** Identification numbers for MS/MS spectra deposition for pseudobulbiferamides in the GNPS library

|          |               |                    |
|----------|---------------|--------------------|
| <b>5</b> | $[M+H]^+$     | CCMSLIB00011427564 |
| <b>5</b> | $[M+2H]^{2+}$ | CCMSLIB00011427566 |
| <b>6</b> | $[M+H]^+$     | CCMSLIB00011427563 |
| <b>6</b> | $[M+2H]^{2+}$ | CCMSLIB00011427567 |
| <b>7</b> | $[M+H]^+$     | CCMSLIB00011427565 |
| <b>8</b> | $[M+H]^+$     | CCMSLIB00011427568 |
| <b>8</b> | $[M+2H]^{2+}$ | CCMSLIB00011427569 |

SUPPLEMENTARY FIGURES

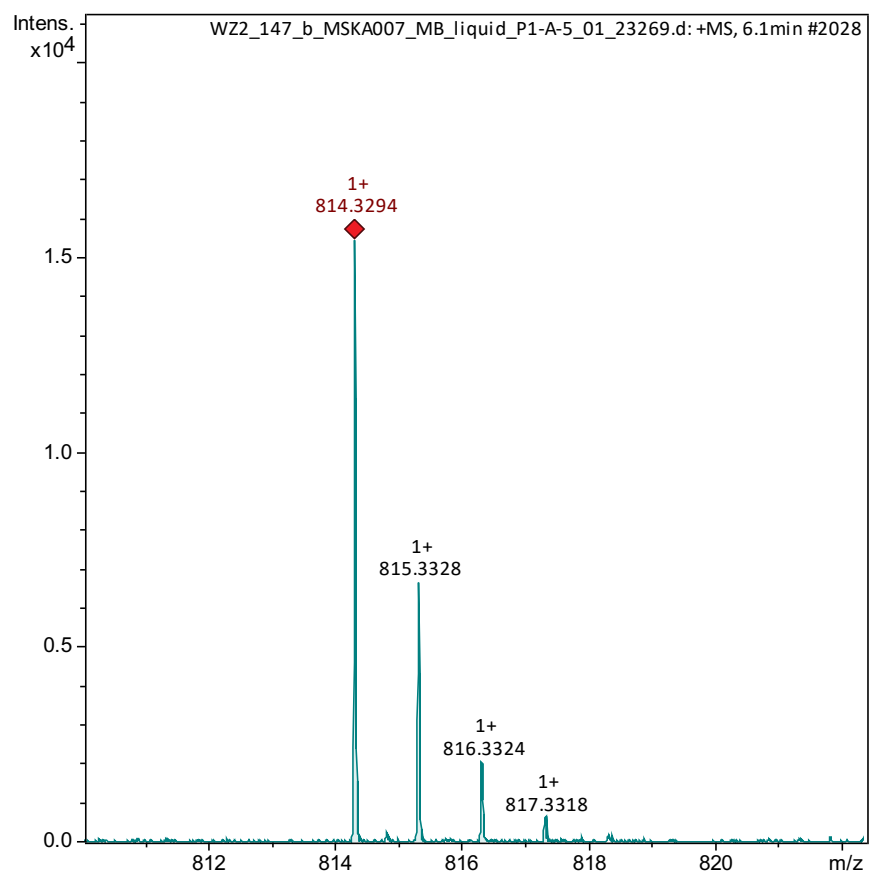

Figure S1. High resolution  $[M+H]^+$  MS<sup>1</sup> spectrum for **5**.

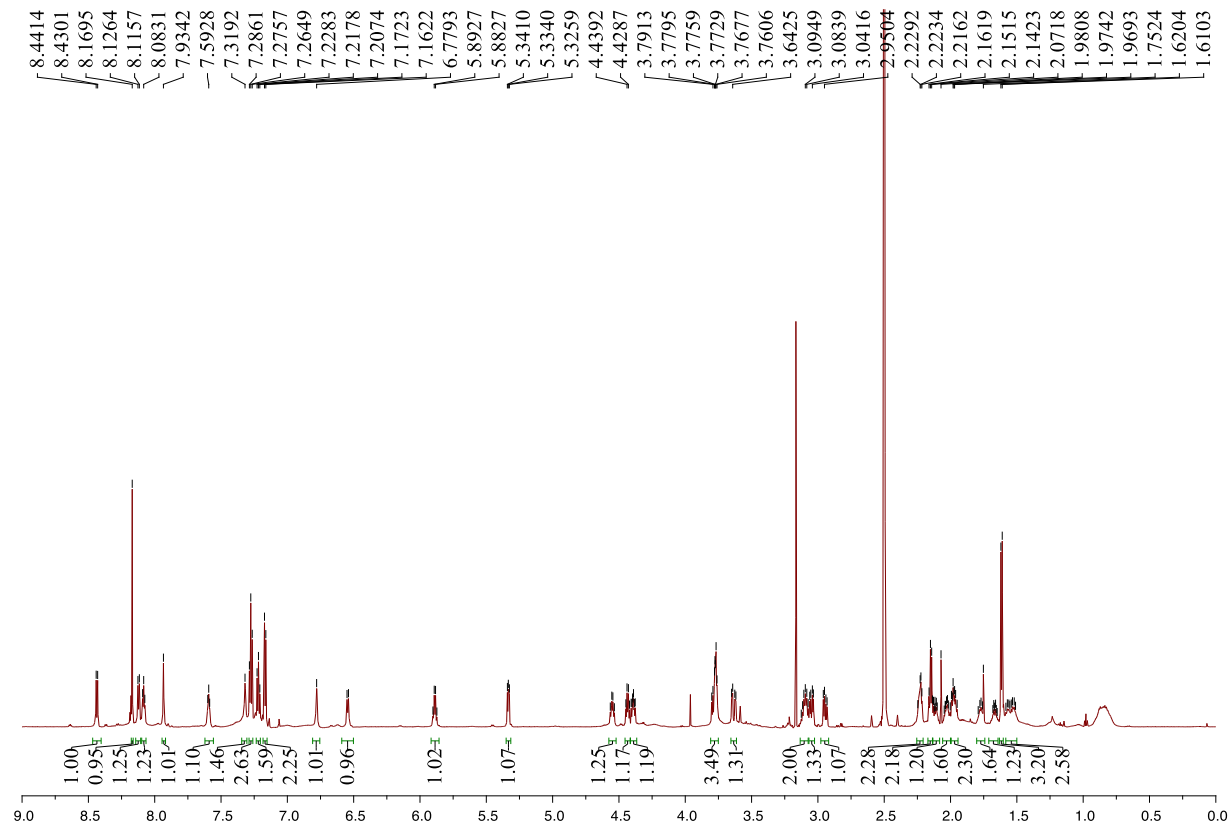

**Figure S2.** The  $^1\text{H}$  NMR spectrum of **5** (700 MHz,  $\text{DMSO-}d_6$ ).

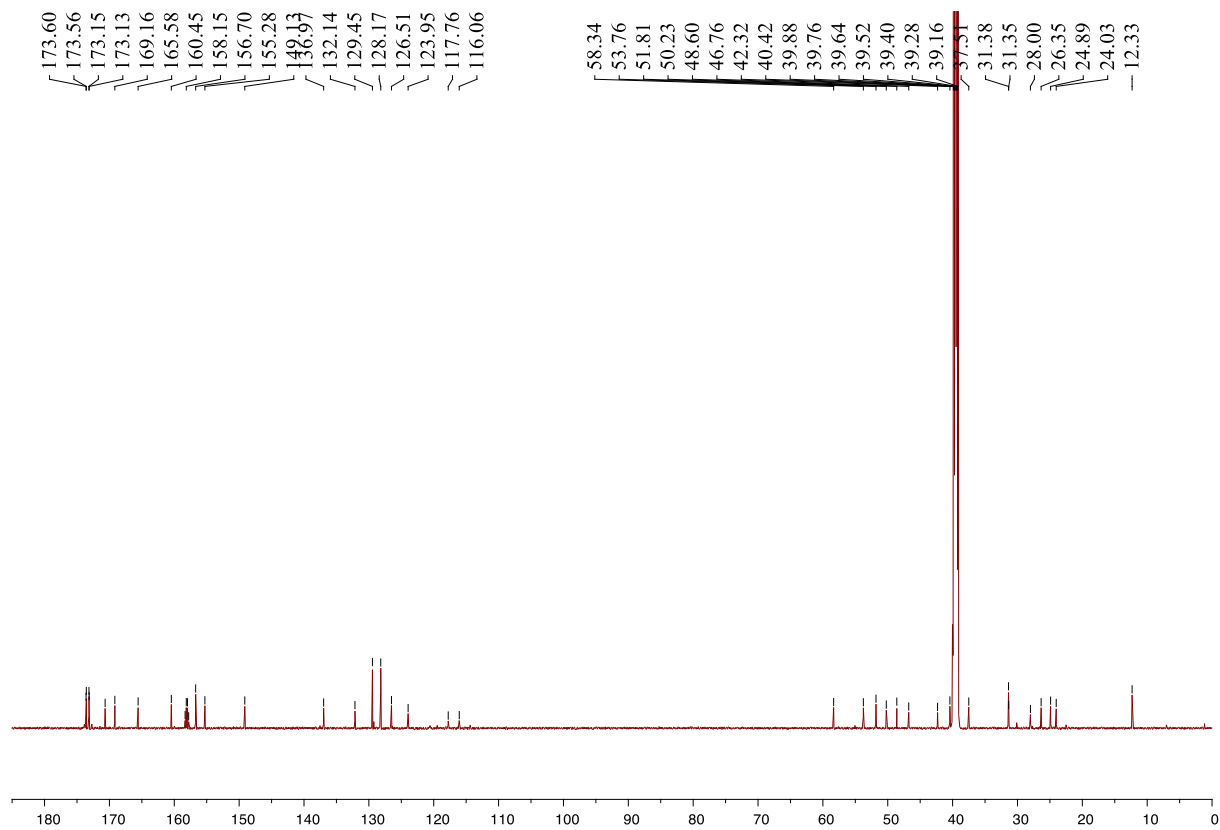

**Figure S3.** The  $^{13}\text{C}$  NMR spectrum of **5** (176 MHz,  $\text{DMSO-}d_6$ ).

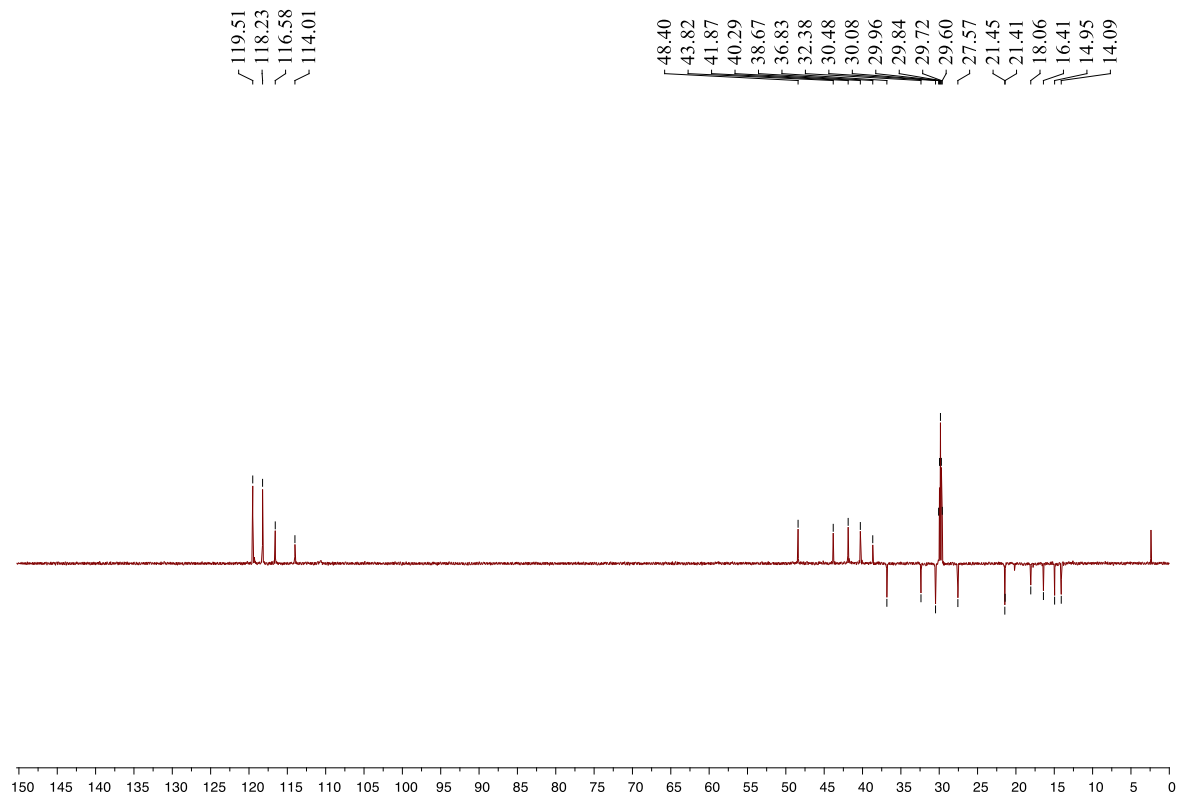

**Figure S4.** The DEPT135 spectrum of **5** (176 MHz, DMSO- $d_6$ ).

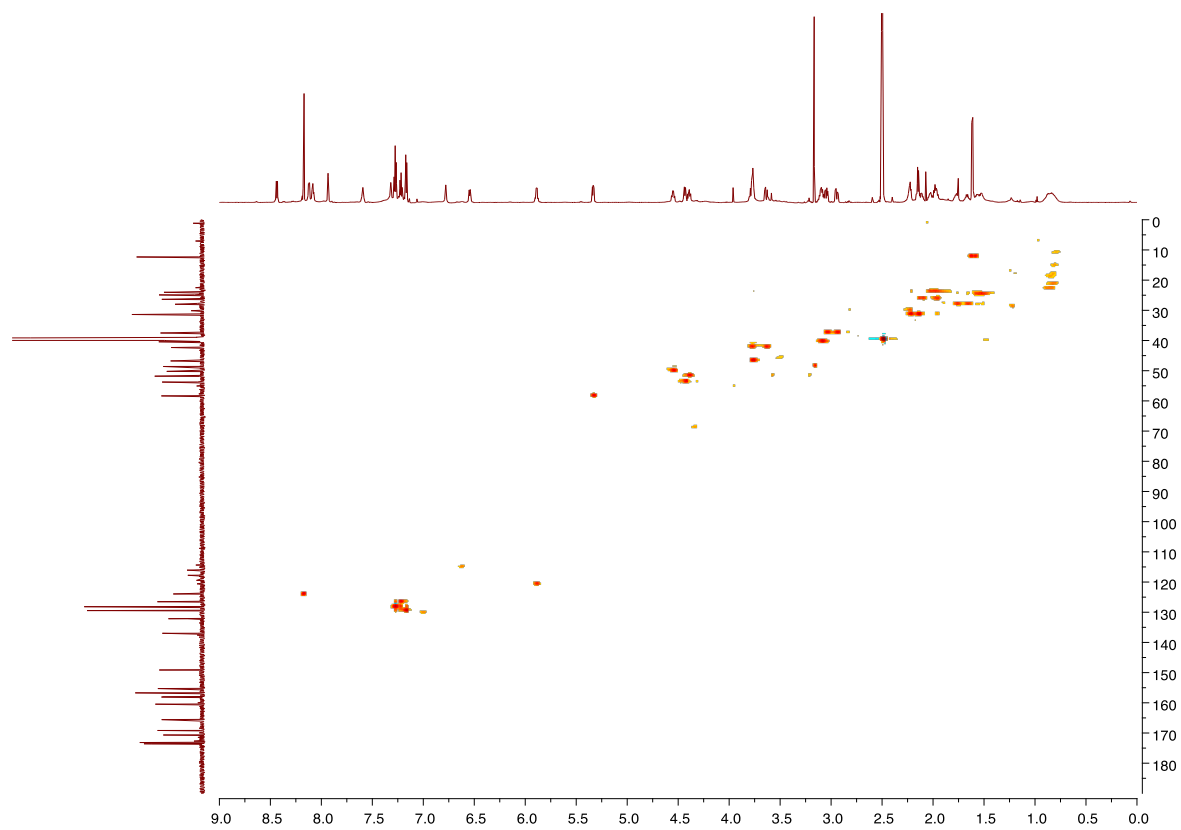

**Figure S5.** The HSQC spectrum of **5** (700 MHz, DMSO-*d*<sub>6</sub>).



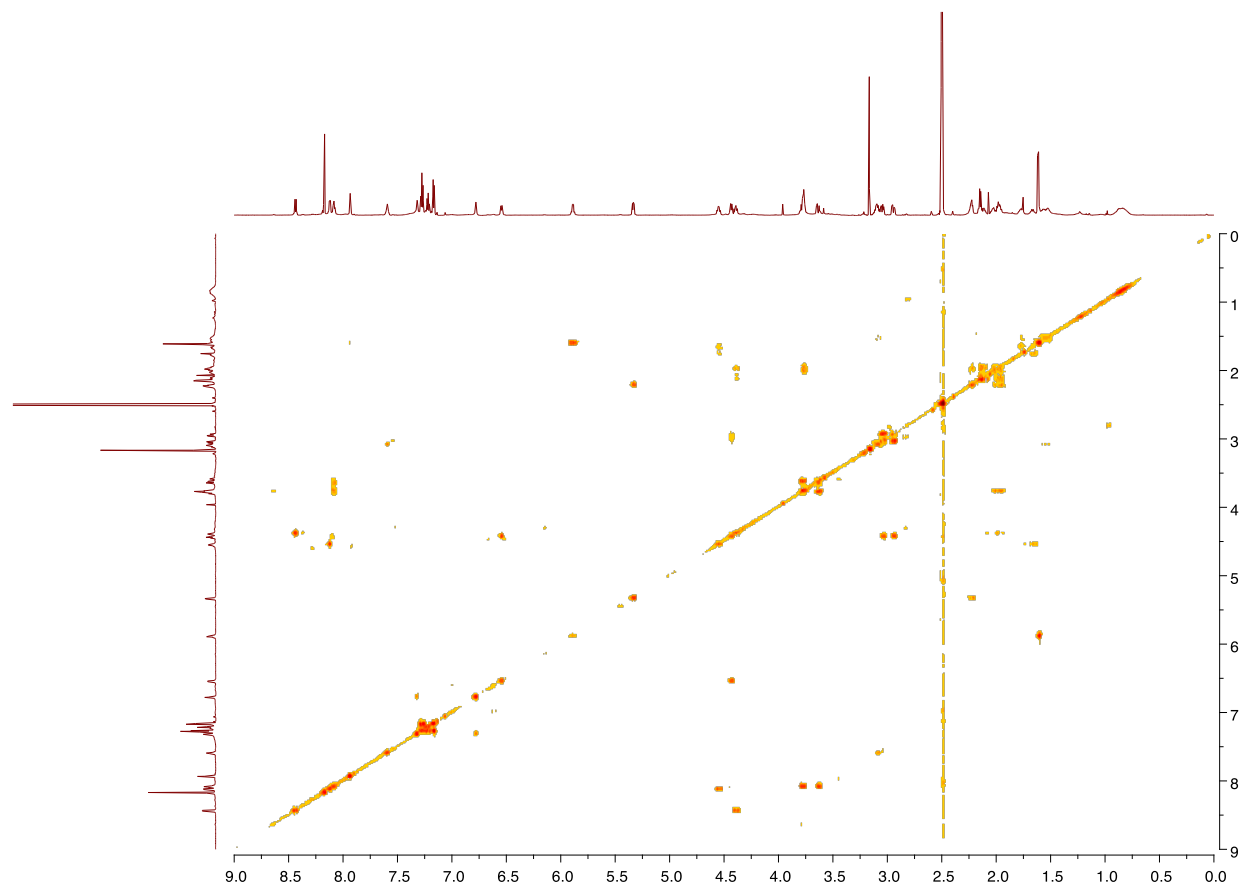

**Figure S6.** The  $^1\text{H}$ - $^1\text{H}$  COSY spectrum of **5** (700 MHz,  $\text{DMSO-}d_6$ ).

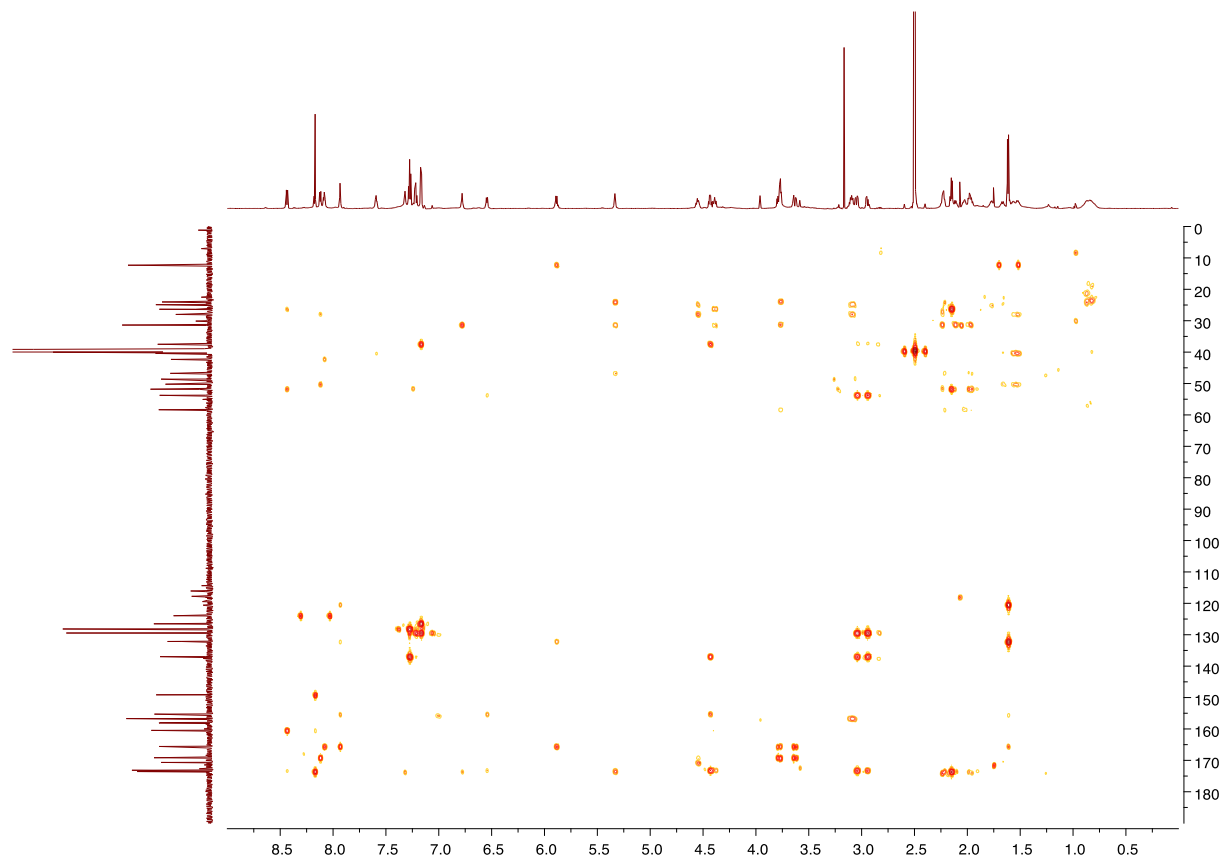

**Figure S7.** The HMBC spectrum of **5** (700 MHz, DMSO-*d*<sub>6</sub>).

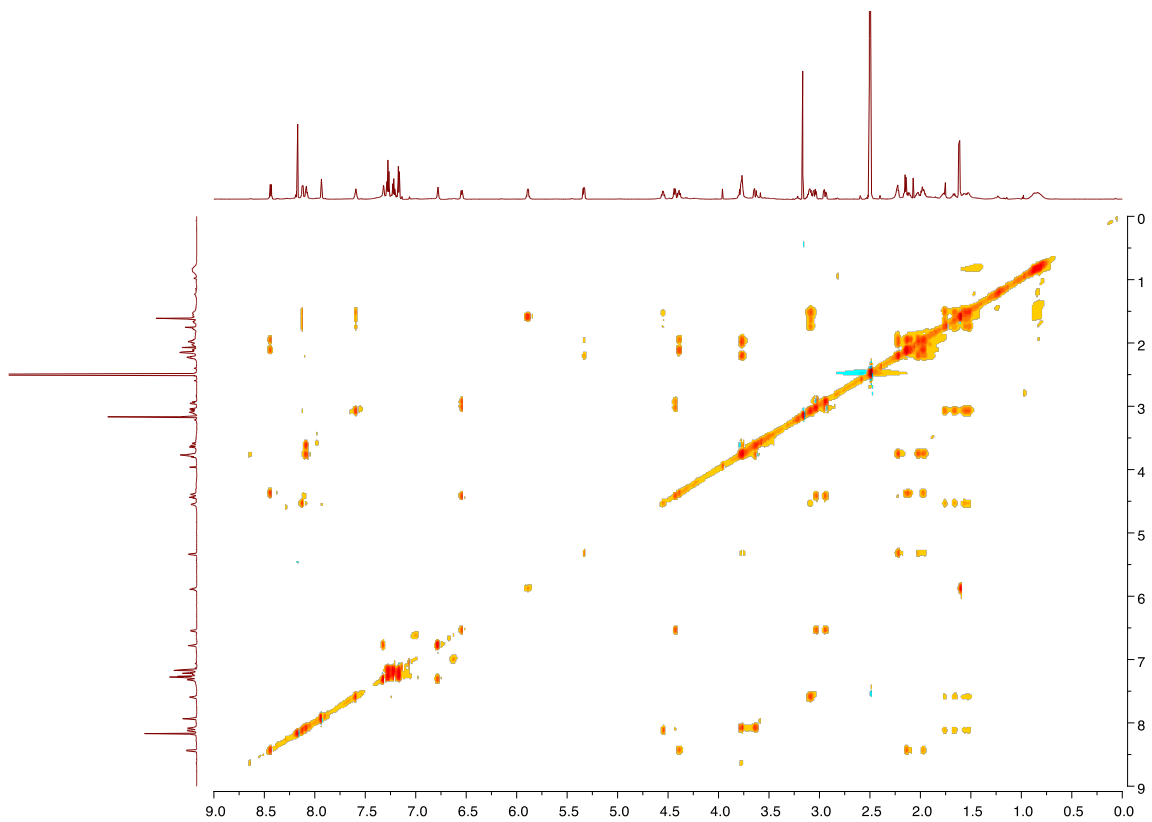

**Figure S8.** The TOCSY spectrum of **5** (700 MHz, DMSO- $d_6$ ).

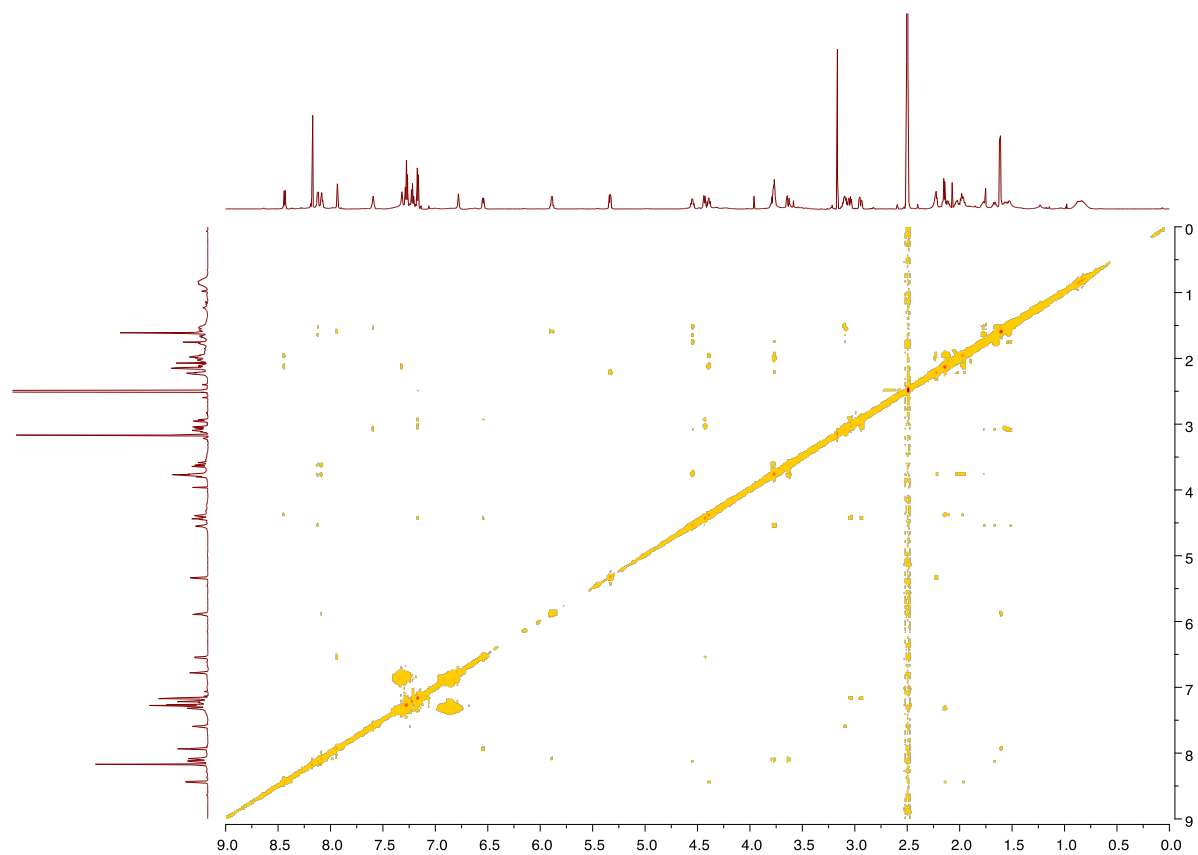

**Figure S9.** The ROESY spectrum of **5** (700 MHz, DMSO-*d*<sub>6</sub>).

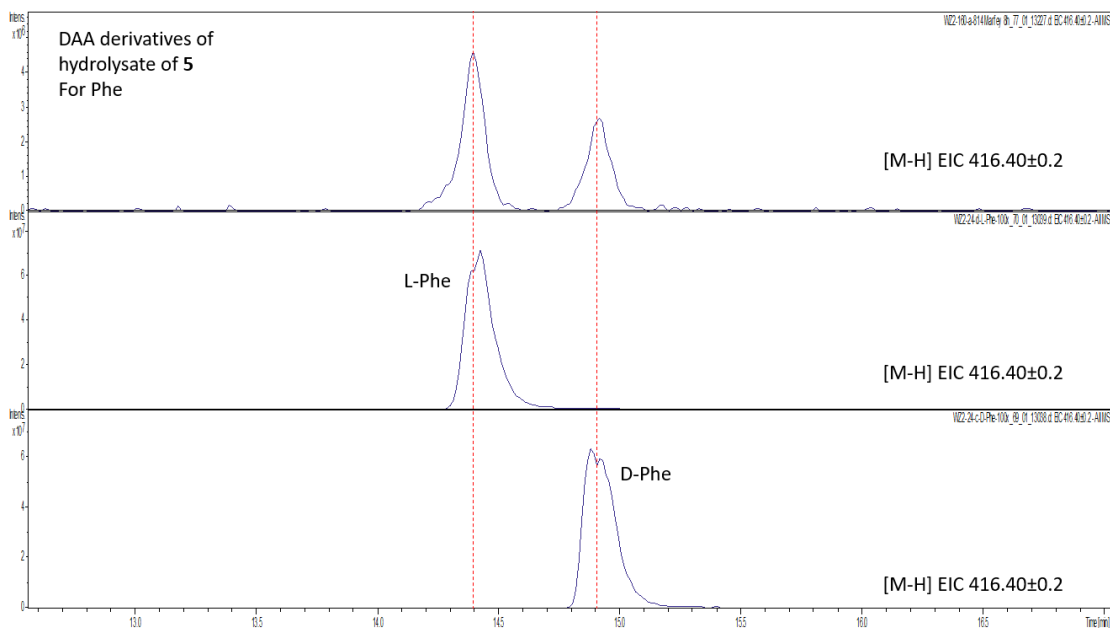

**Figure S10.** Marfey's analysis to determine the absolute configuration of the Phe residue in **5**. Extracted ion chromatograms (EICs) demonstrating the retention time of the 2-4-dinitrophenyl-5-L-alanine amide - derivitized (DAA-derivatized) Phe residue resulting from the acid hydrolysis of **5** (top), retention time of DAA-derivatized standard of L-Phe (middle), and the retention time of the similarly derivatized standard of D-Phe (bottom). Of note, although only one Phe is present in **5**, both a major peak of L-Phe and a minor one of D-Phe were detected by retention time matching. We deduced that racemization of L-Phe took place during acidic hydrolysis, which is akin to homophymamide A that has been verified by chemical synthesis, due to their exocyclic amino acid residue structures attached to the ureido bond.<sup>1</sup> Separation was achieved using the Agilent Poroshell EC-C18 (100×4.6 mm, 2.7 μm) column. Mass spectrometry data were acquired in the negative ionization mode.

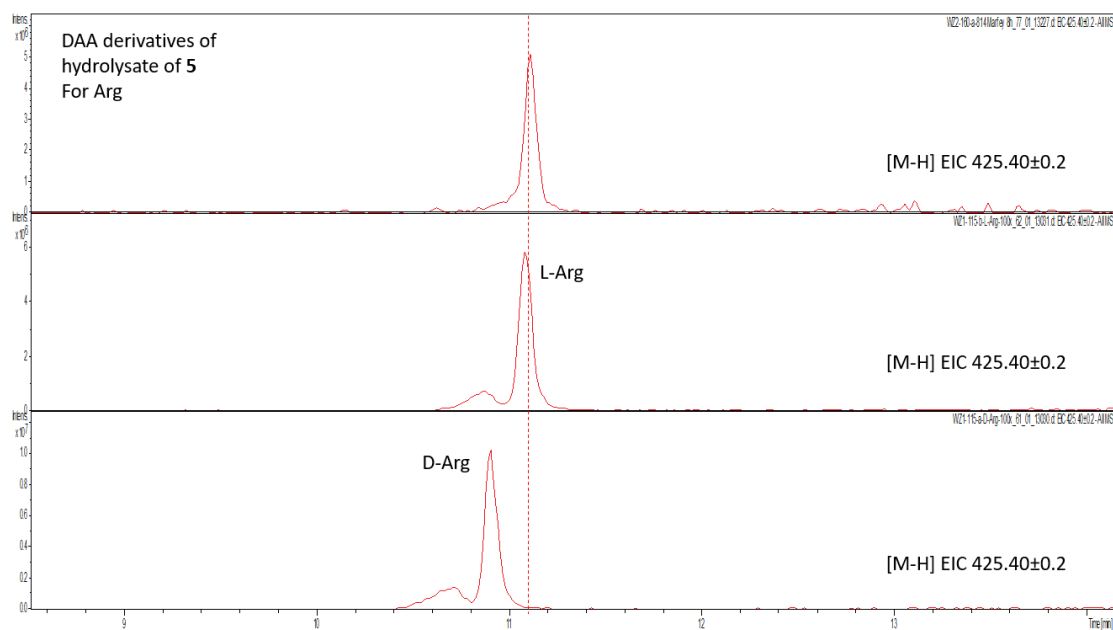

**Figure S11.** Marfey's analysis to determine the absolute configuration of the Arg residue in **5**. Extracted ion chromatograms (EICs) demonstrating the retention time of the DAA-derivatized Arg residue resulting from the acid hydrolysis of **5** (top), retention time of DAA-derivatized standard of L-Arg (middle), and the retention time of the similarly derivatized standard of D-Arg (bottom). By retention time matching, the Arg residue in **5** was determined to be L-Arg. Separation was achieved using the Agilent Poroshell EC-C18 (100×4.6 mm, 2.7 μm) column. Mass spectrometry data were acquired in the negative ionization mode.

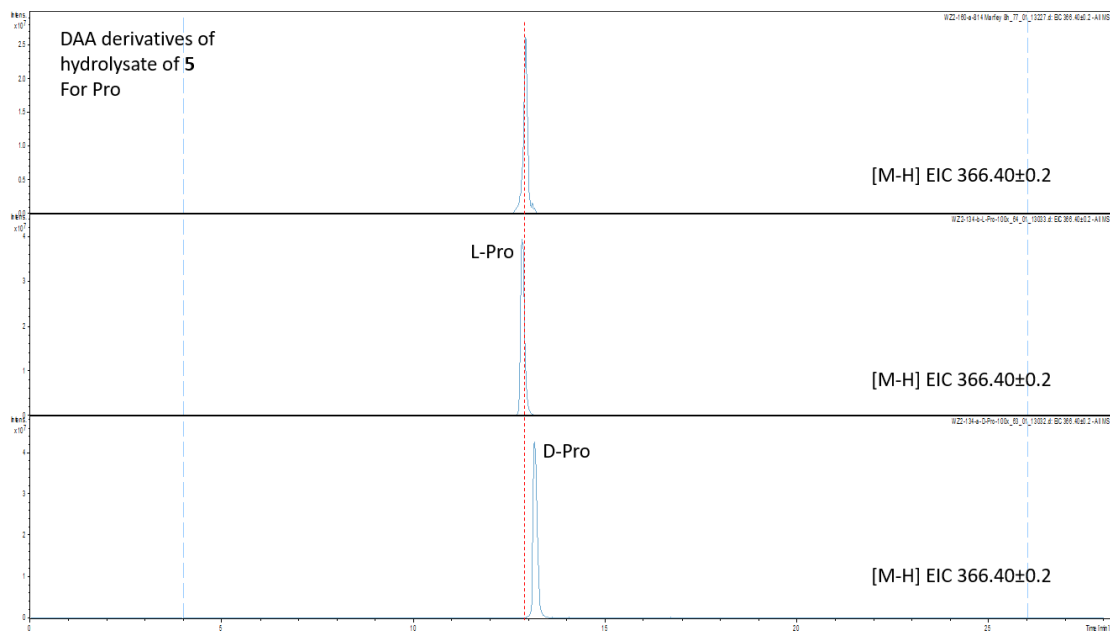

**Figure S12.** Marfey's analysis to determine the absolute configuration of the Pro residue in **5**. Extracted ion chromatograms (EICs) demonstrating the retention time of the DAA-derivatized Pro residue resulting from the acid hydrolysis of **5** (top), retention time of DAA-derivatized standard of L-Pro (middle), and the retention time of the similarly derivatized standard of D-Pro (bottom). By retention time matching, the Pro residue in **5** was determined to be L-Pro. Separation was achieved using the Agilent Poroshell EC-C18 (100×4.6 mm, 2.7  $\mu$ m) column. Mass spectrometry data were acquired in the negative ionization mode.

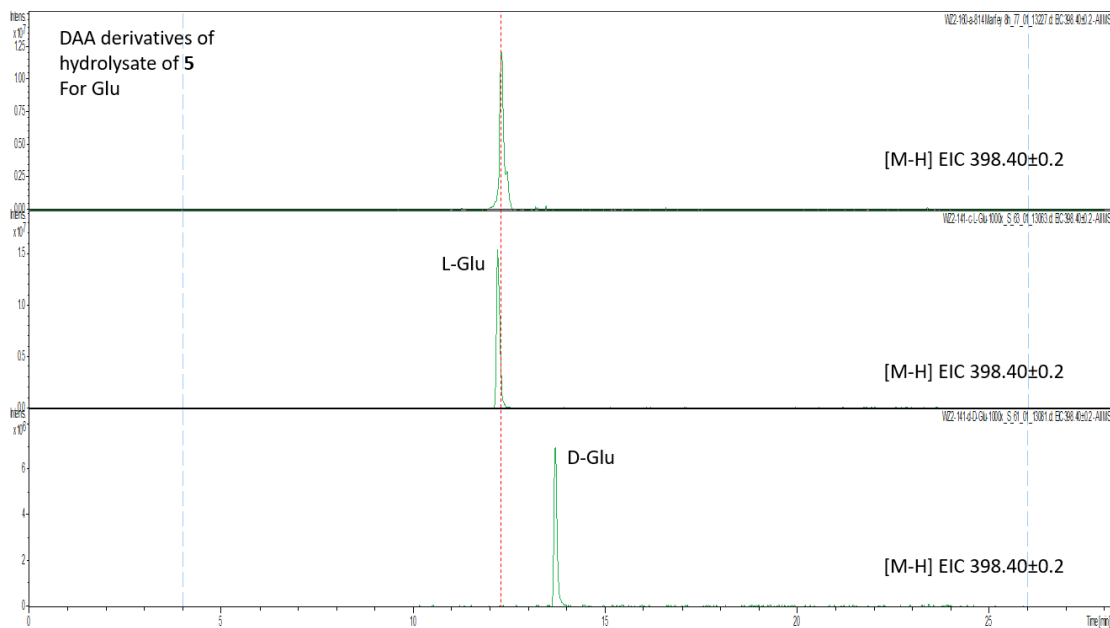

**Figure S13.** Marfey's analysis to determine the absolute configuration of the Gln residue in **5**. During acid hydrolysis, Gln is converted to Glu. Hence, Glu standards are used here. Extracted ion chromatograms (EICs) demonstrating the retention time of the DAA-derivatized Glu residue resulting from the acid hydrolysis of **5** (top), retention time of DAA-derivatized standard of L-Glu (middle), and the retention time of the similarly derivatized standard of D-Glu (bottom). By retention time matching, the Gln residue in **5** was determined to be L-Gln. Separation was achieved using the Agilent Poroshell EC-C18 (100×4.6 mm, 2.7 μm) column. Mass spectrometry data were acquired in the negative ionization mode.



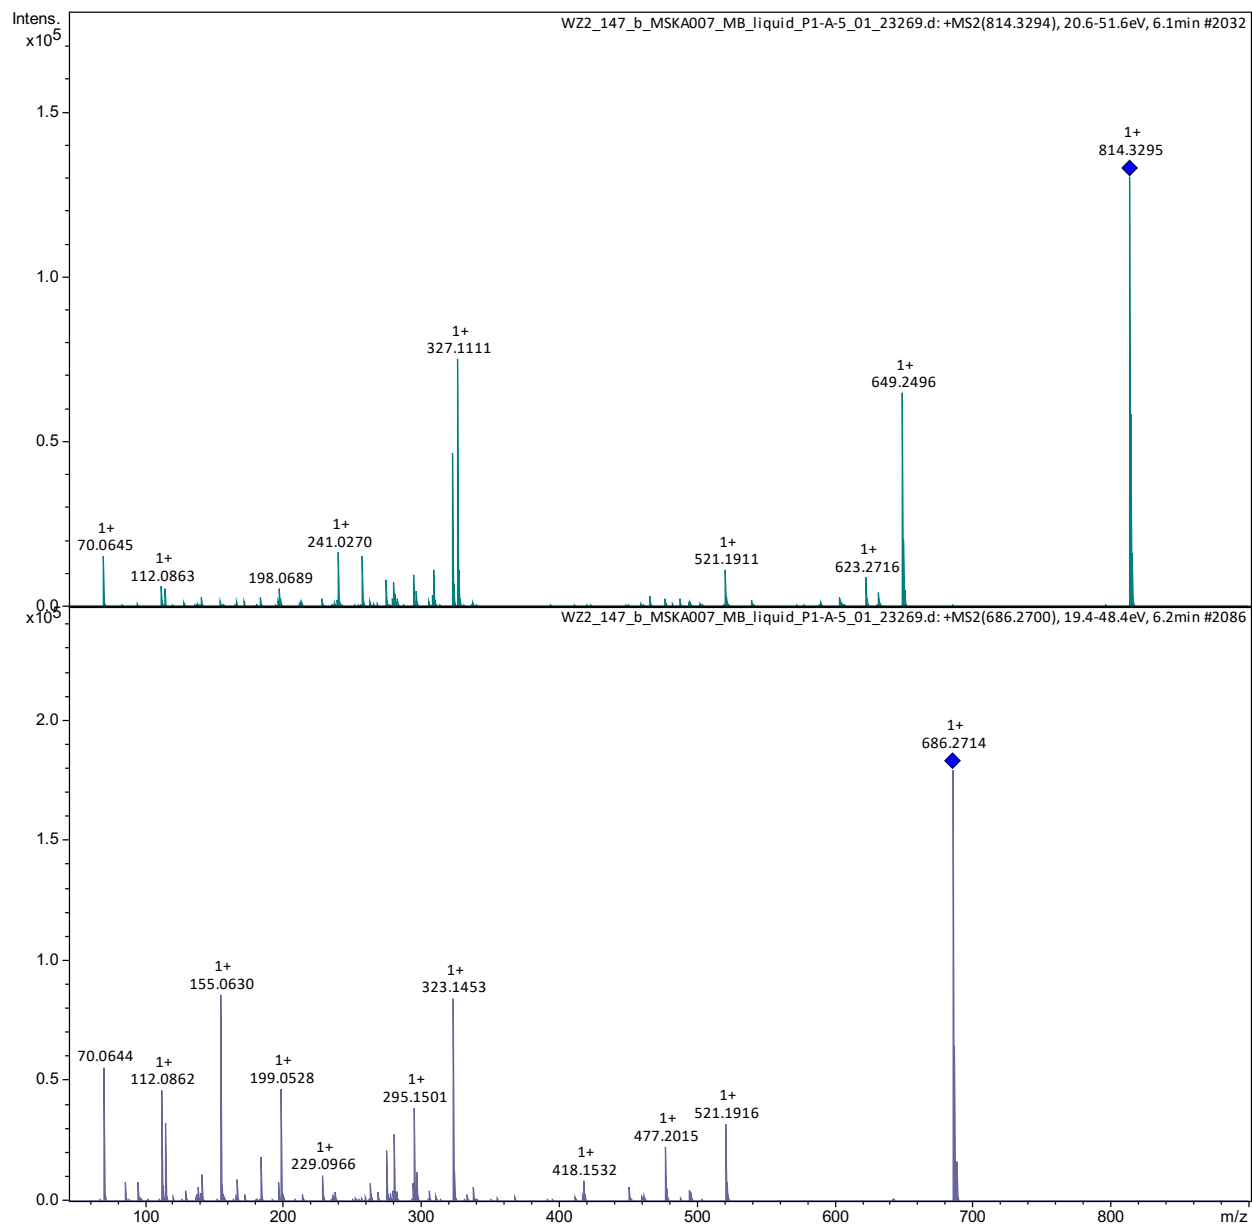

Figure S14. HRMS/MS spectra for **5** (top) and **6** (bottom).

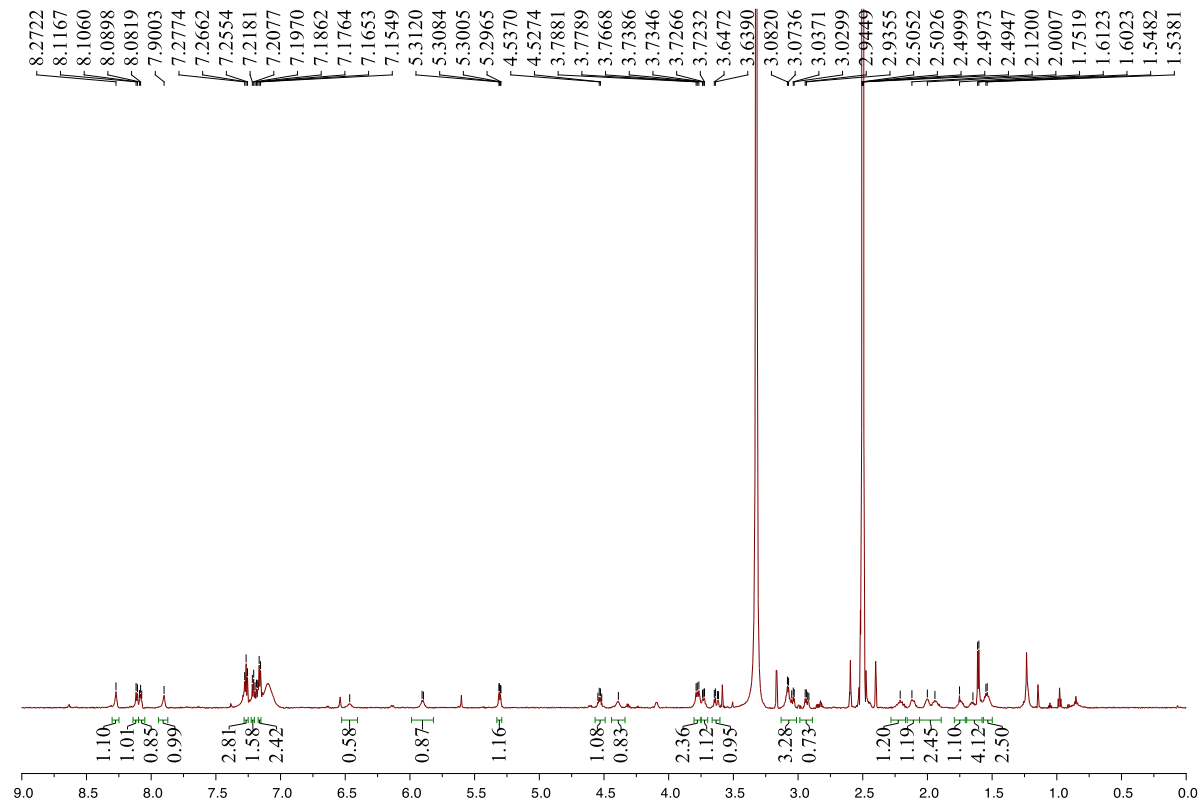

**Figure S15.** The  $^1\text{H}$  NMR spectrum of **6** (700 MHz,  $\text{DMSO-}d_6$ ).

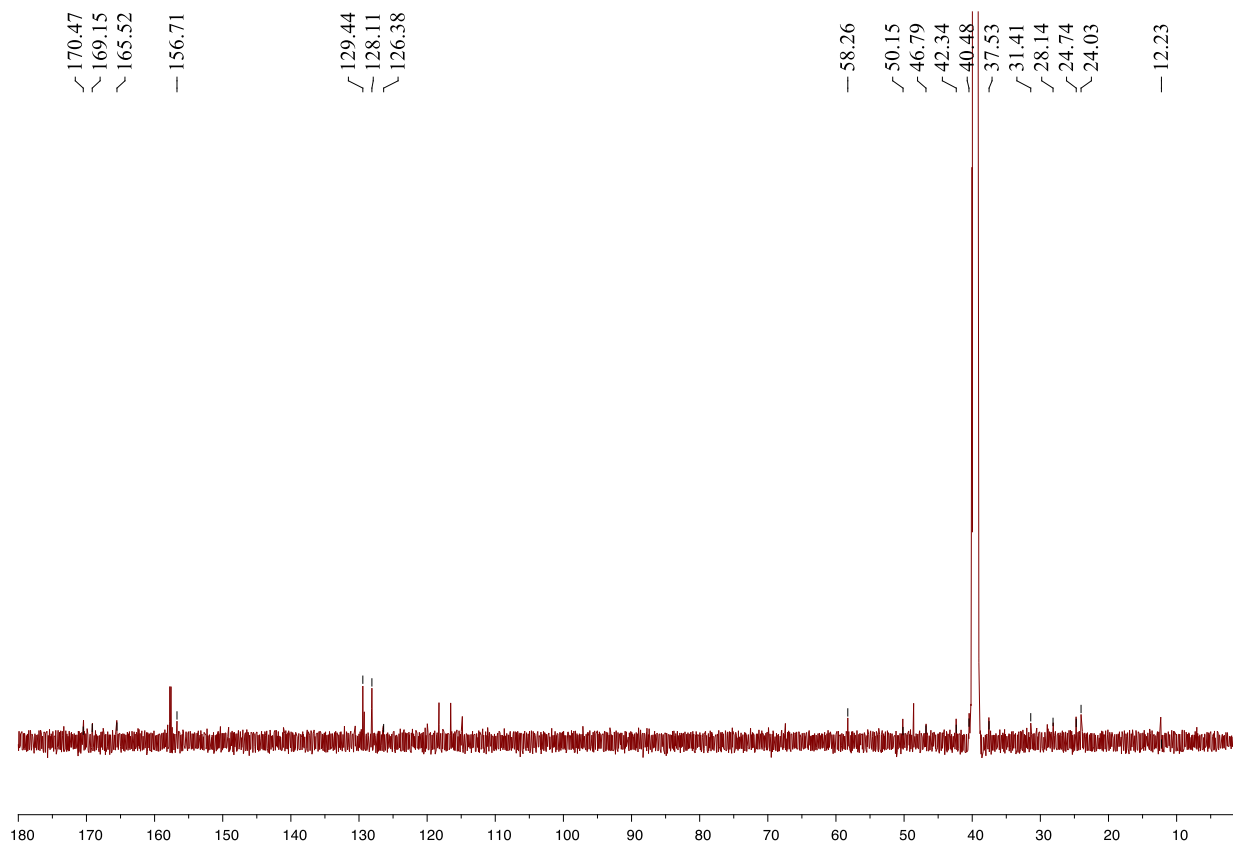

**Figure S16.** The  $^{13}\text{C}$  NMR spectrum of **6** (176 MHz,  $\text{DMSO-}d_6$ ).

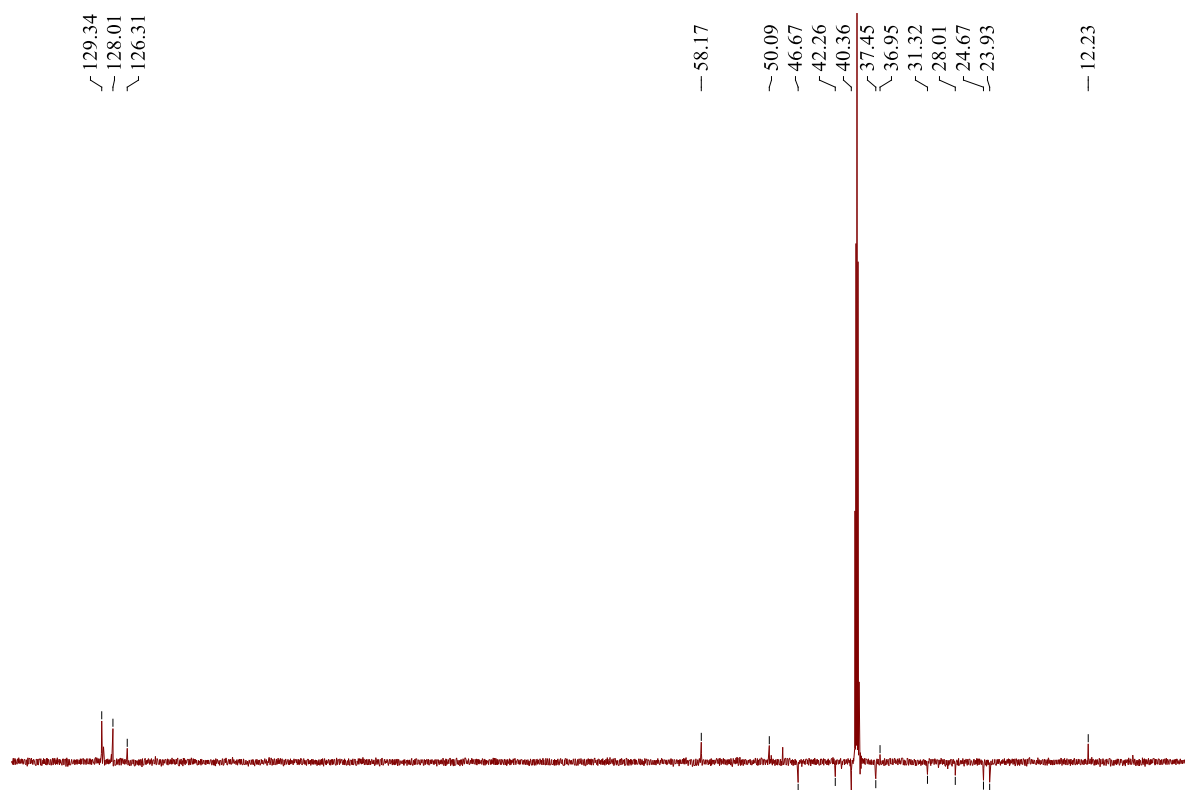

**Figure S17.** The DEPT135 spectrum of **6** (176 MHz, DMSO-*d*<sub>6</sub>).

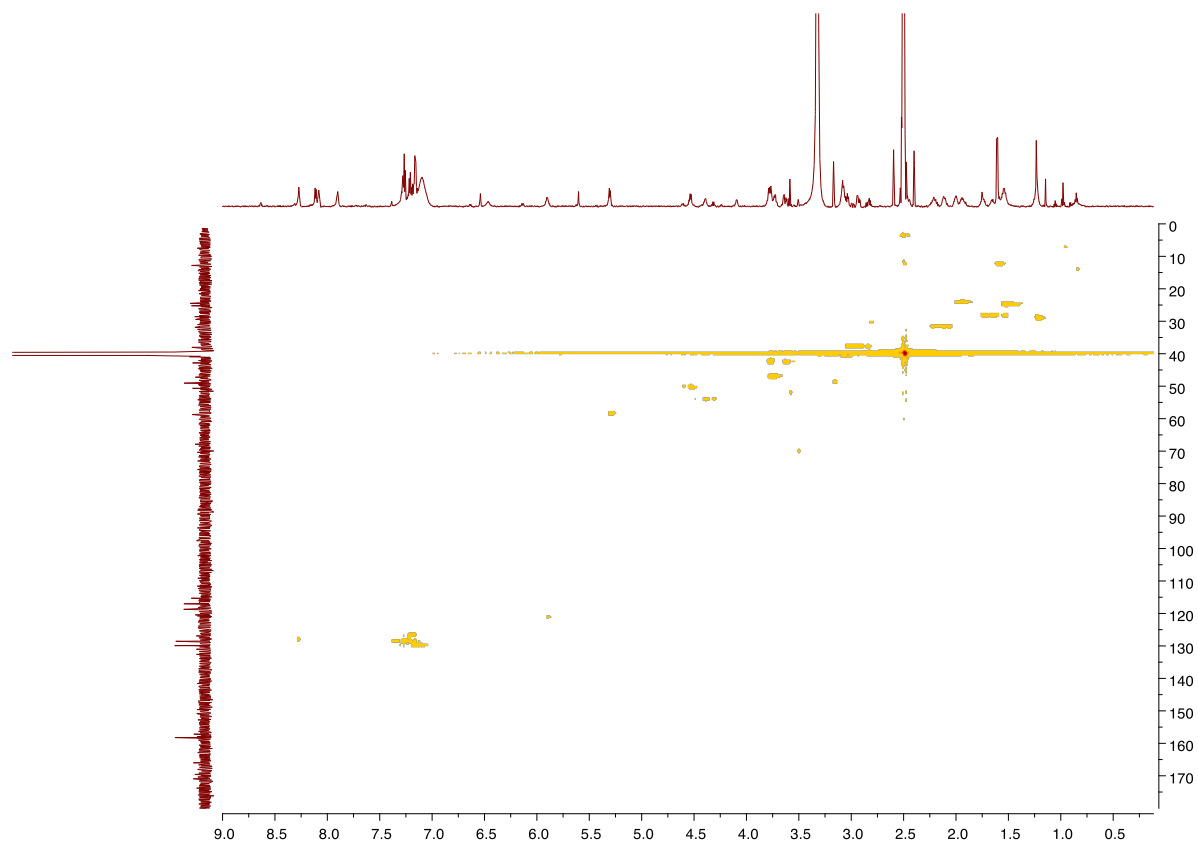

**Figure S18.** The HSQC spectrum of **6** (700 MHz, DMSO-*d*<sub>6</sub>).

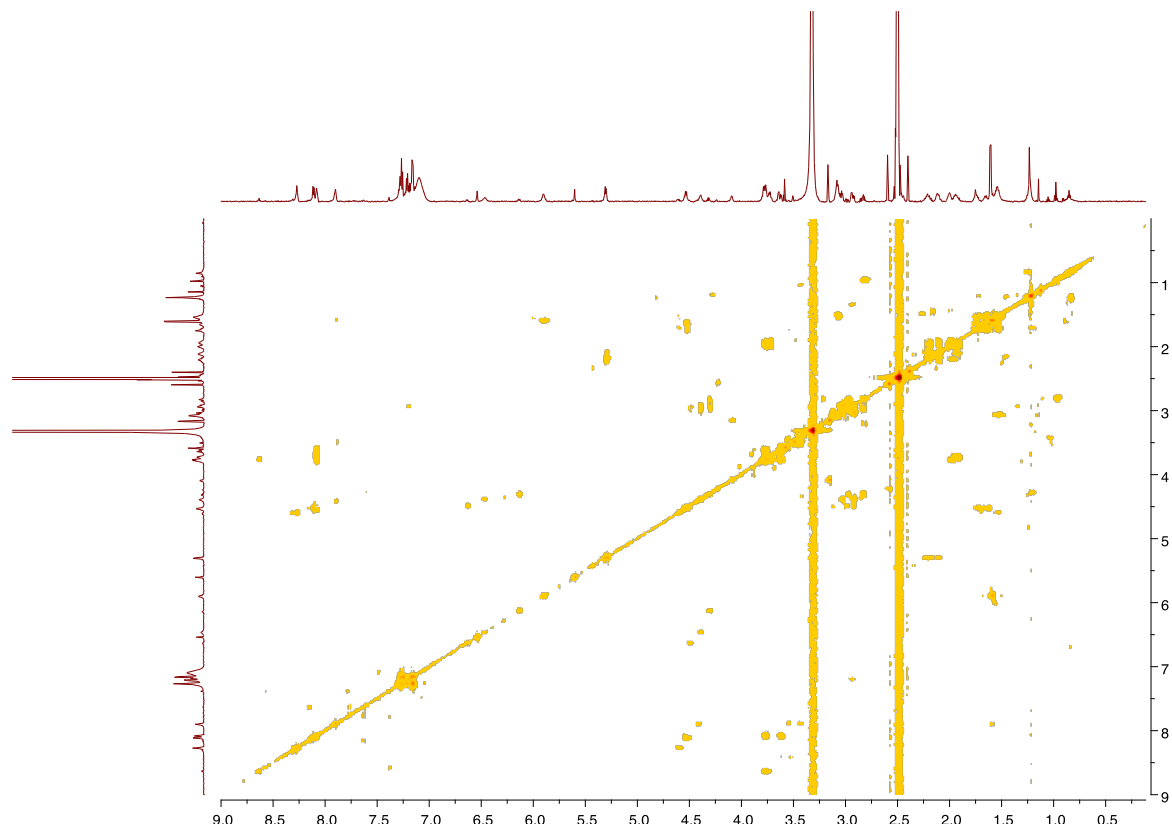

**Figure S19.** The  $^1\text{H}$ - $^1\text{H}$  COSY spectrum of **6** (700 MHz,  $\text{DMSO-}d_6$ ).

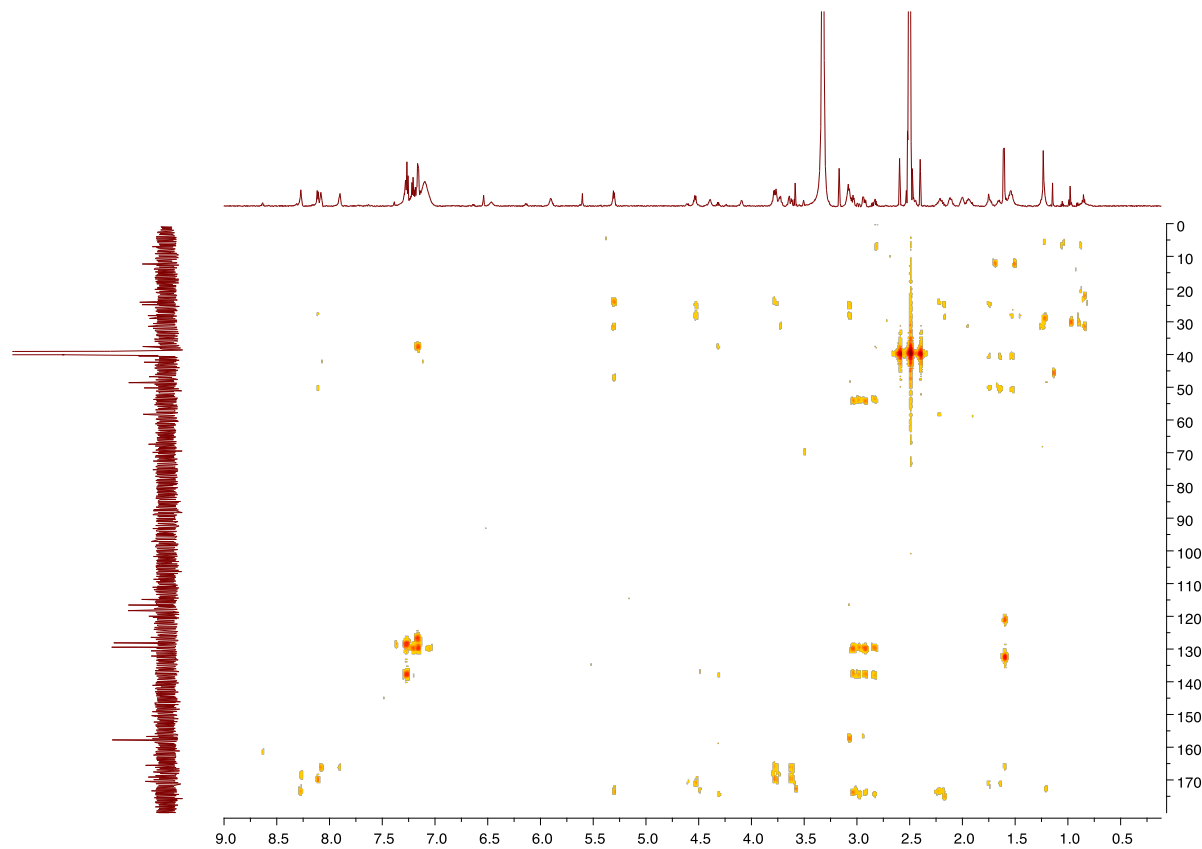

**Figure S20.** The HMBC spectrum of **6** (700 MHz, DMSO-*d*<sub>6</sub>).

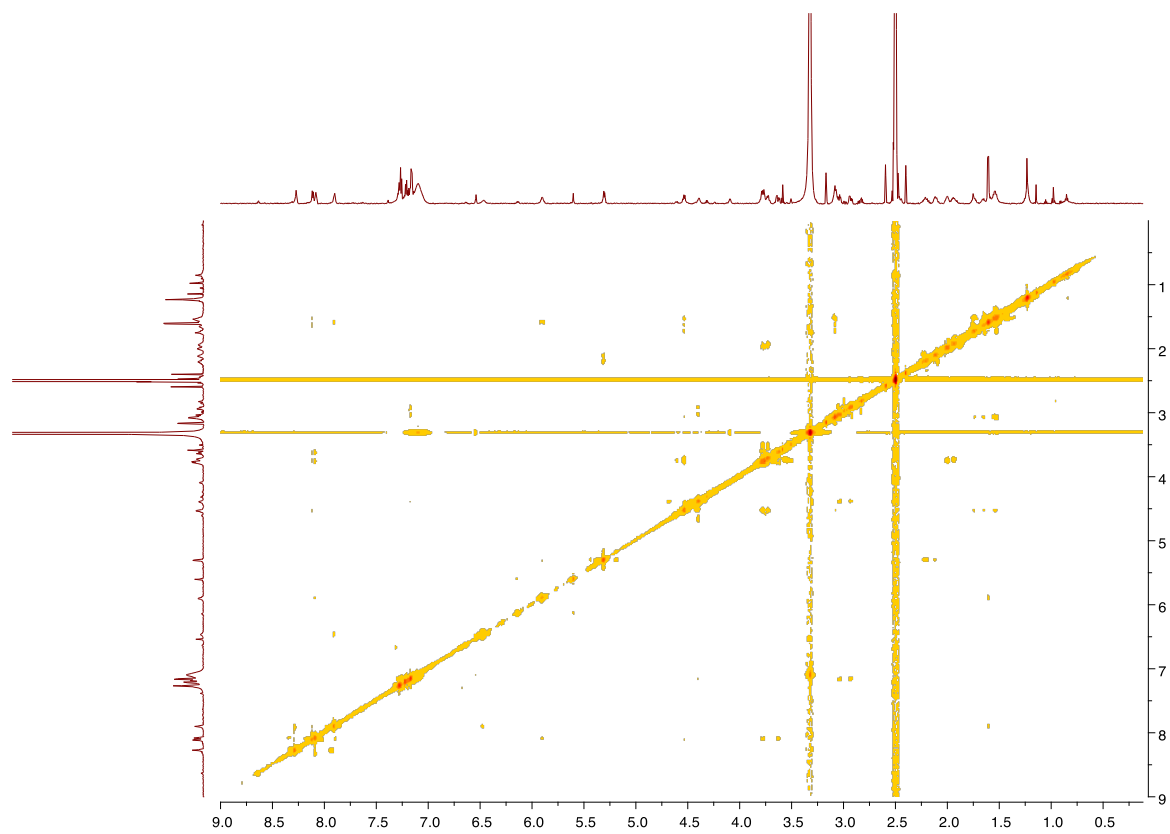

**Figure S21.** The ROESY spectrum of **6** (700 MHz, DMSO-*d*<sub>6</sub>).



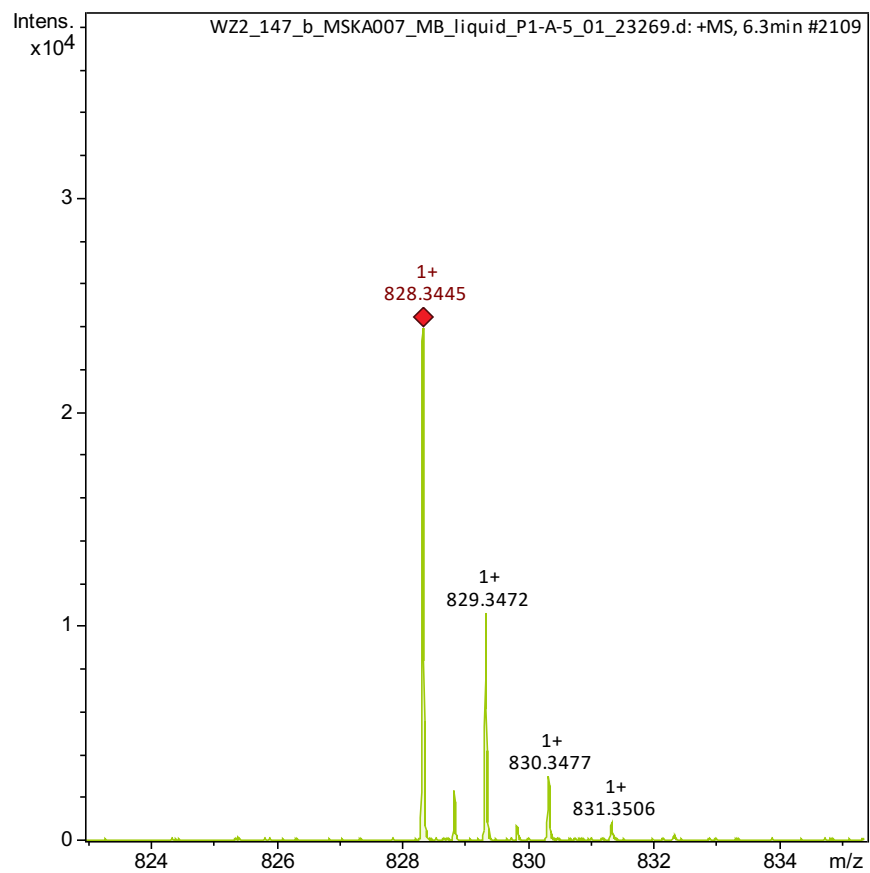

**Figure S22.** High resolution  $[M+H]^+$  MS<sup>1</sup> spectrum for 7.

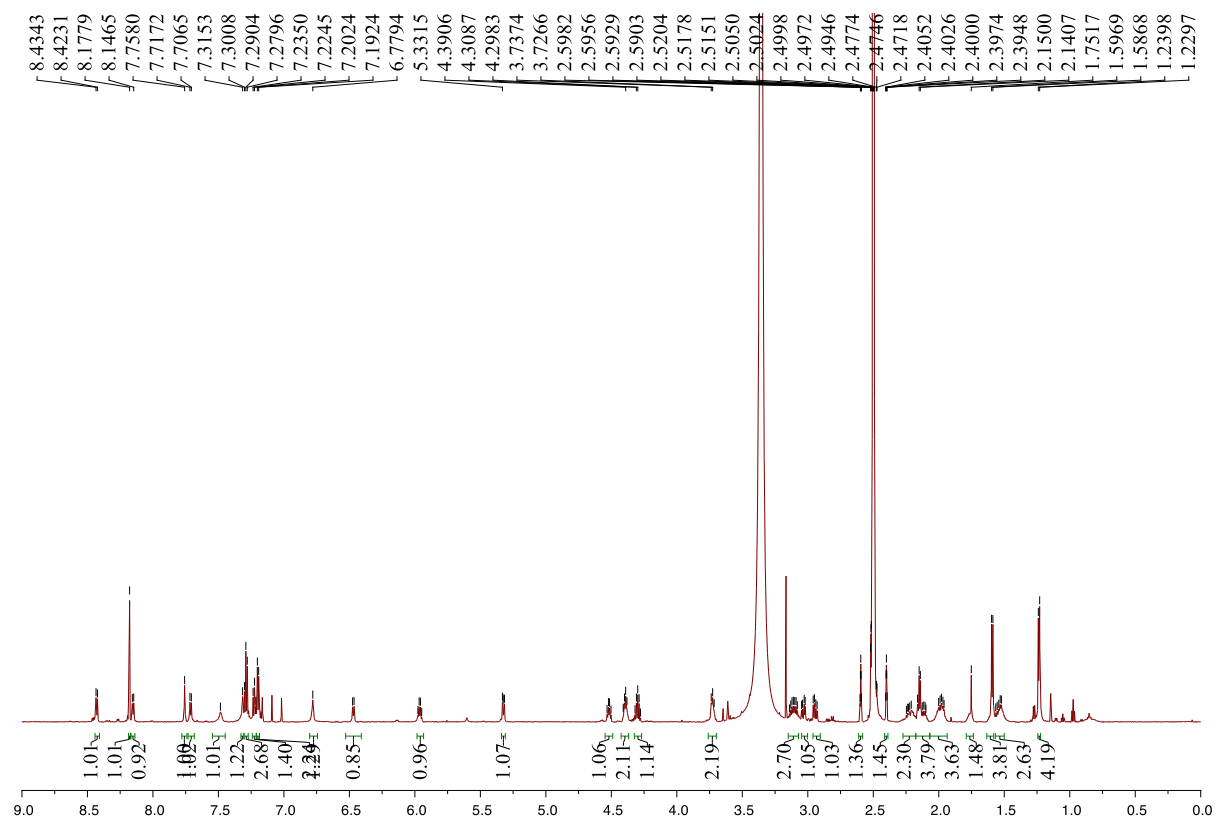

**Figure S23.** The <sup>1</sup>H NMR spectrum of **7** (700 MHz, DMSO-*d*<sub>6</sub>).

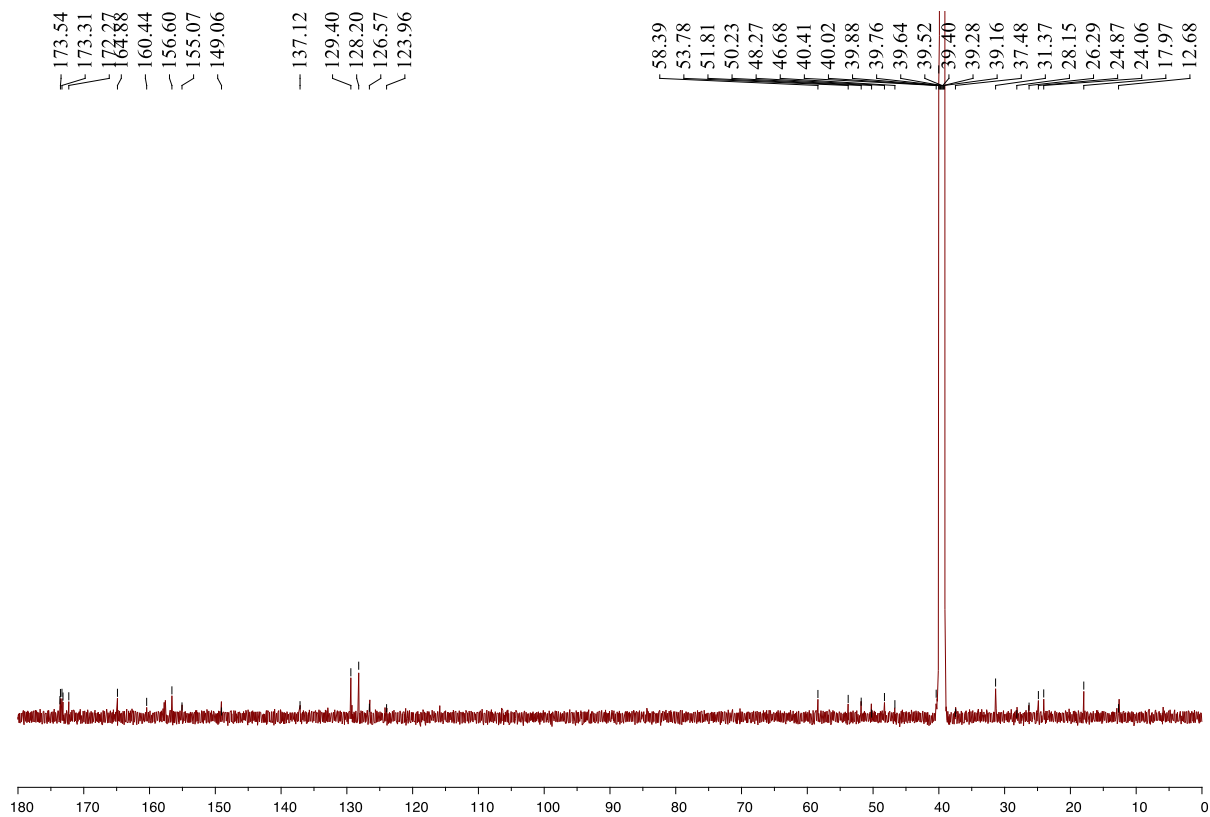

**Figure S24.** The  $^{13}\text{C}$  NMR spectrum of **7** (176 MHz,  $\text{DMSO-}d_6$ ).

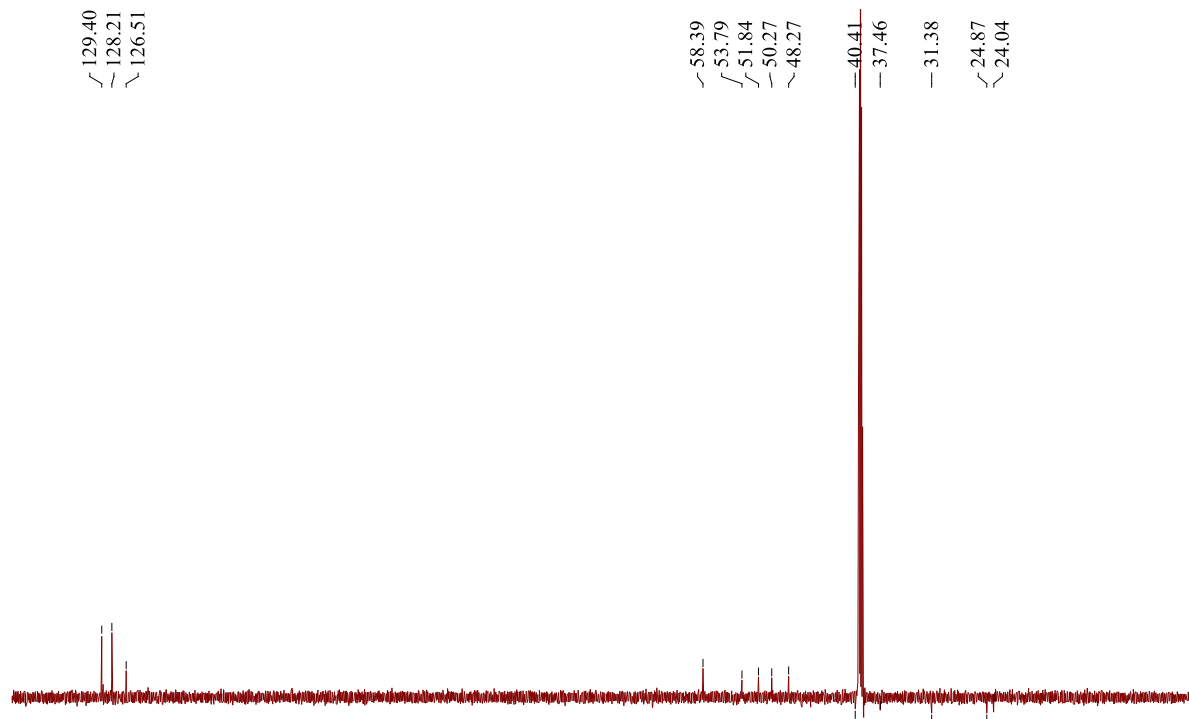

**Figure S25.** The DEPT135 spectrum of **7** (176 MHz, DMSO-*d*<sub>6</sub>).

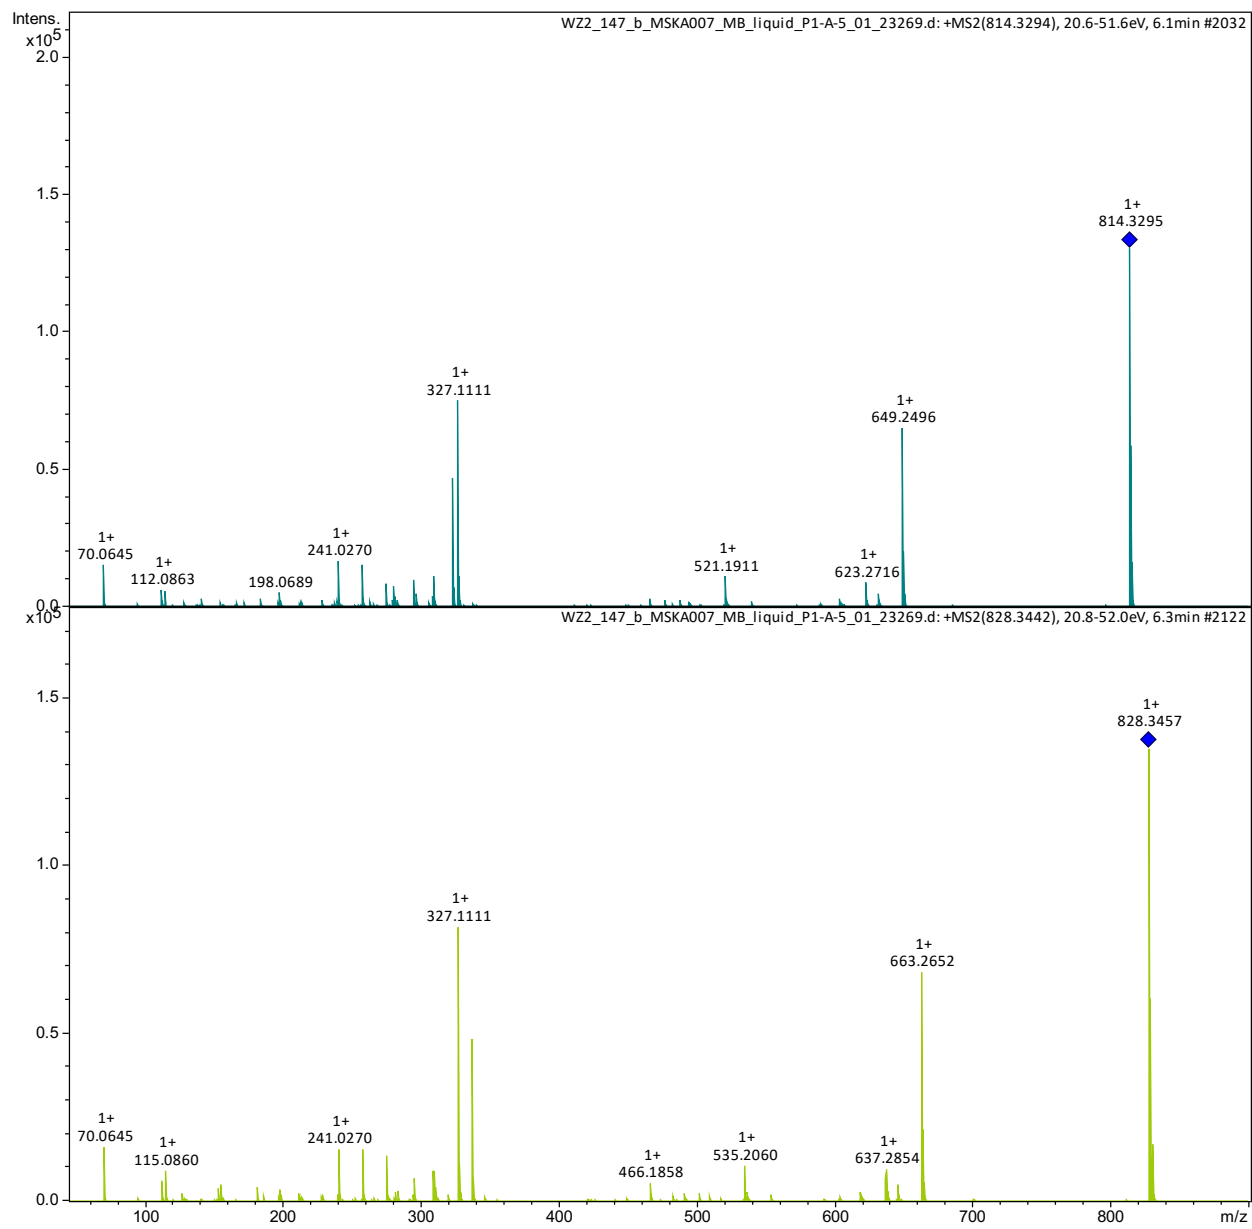

**Figure S26.** HRMS/MS spectra for **5** (top) and **7** (bottom).

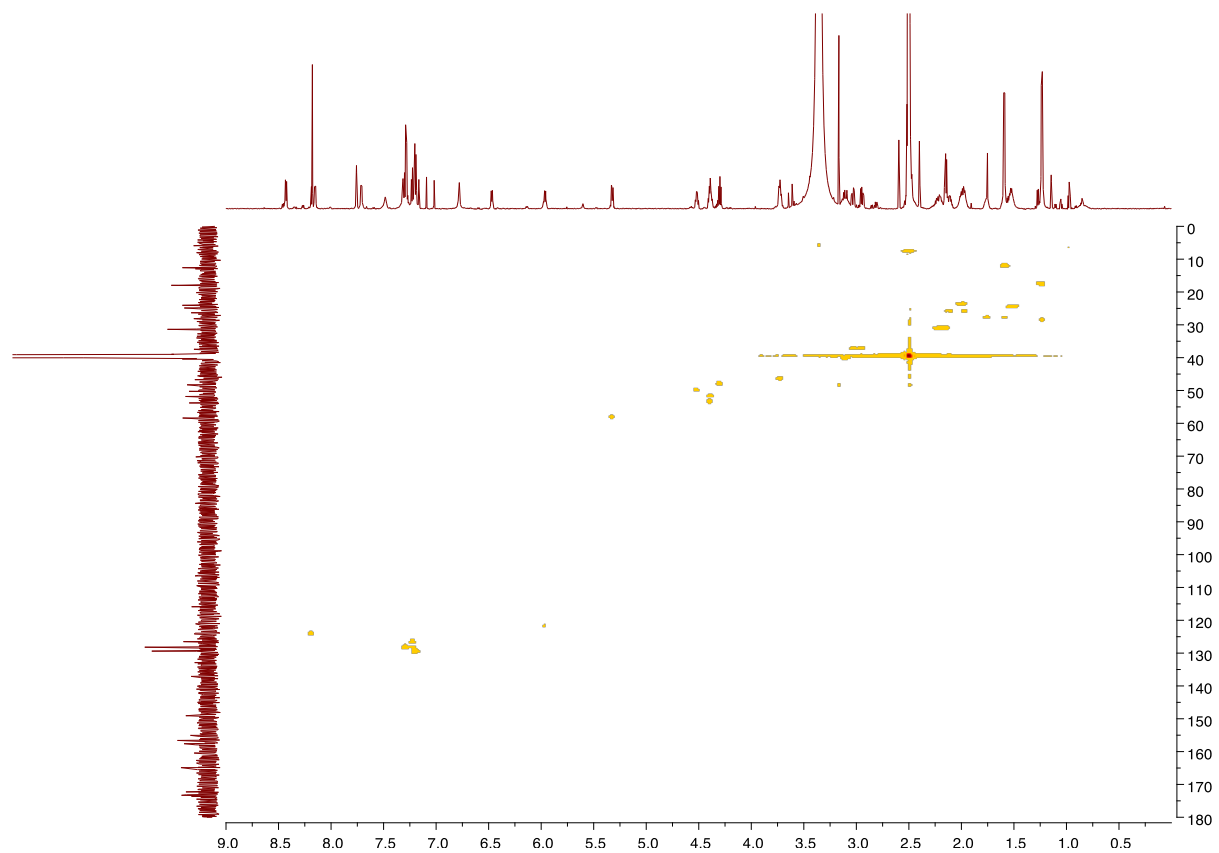

**Figure S27.** The HSQC spectrum of **7** (700 MHz,  $\text{DMSO-}d_6$ ).

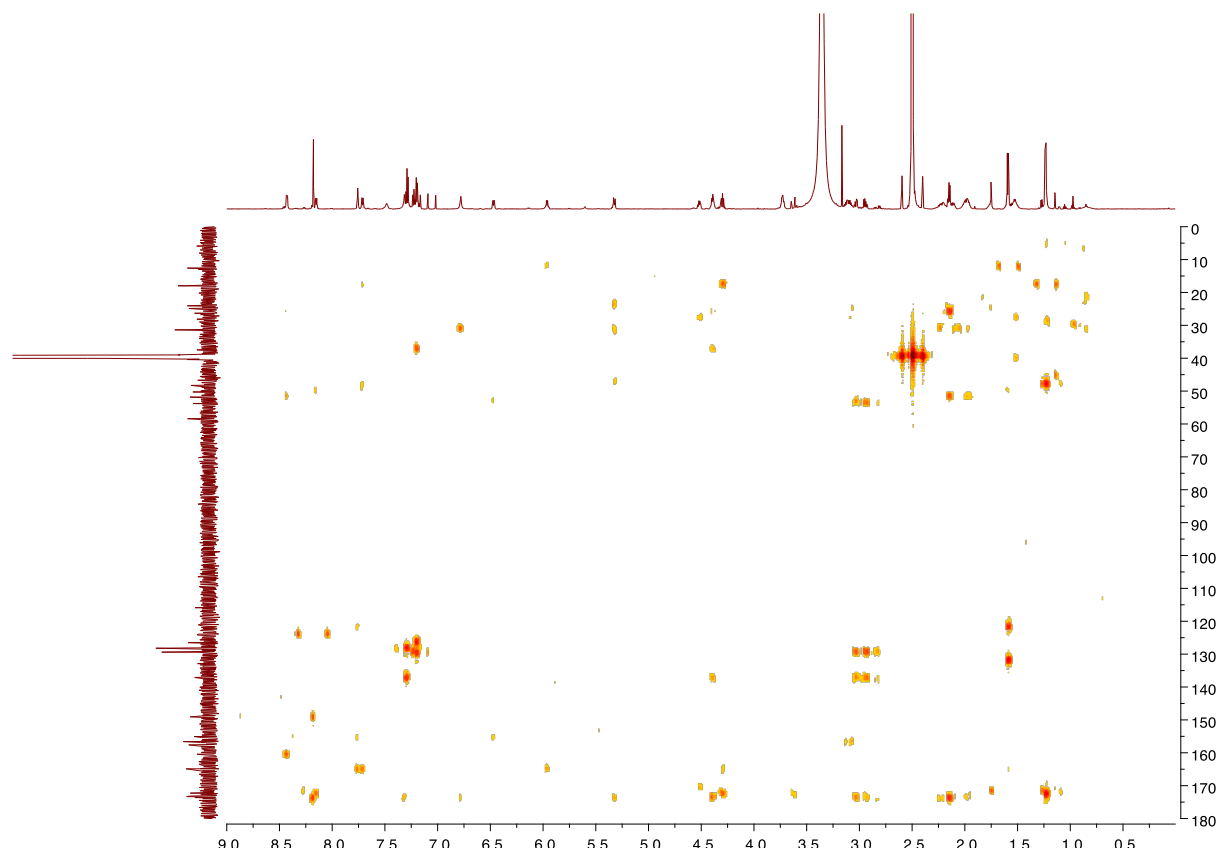

**Figure S28.** The HMBC spectrum of **7** (700 MHz, DMSO-*d*<sub>6</sub>).

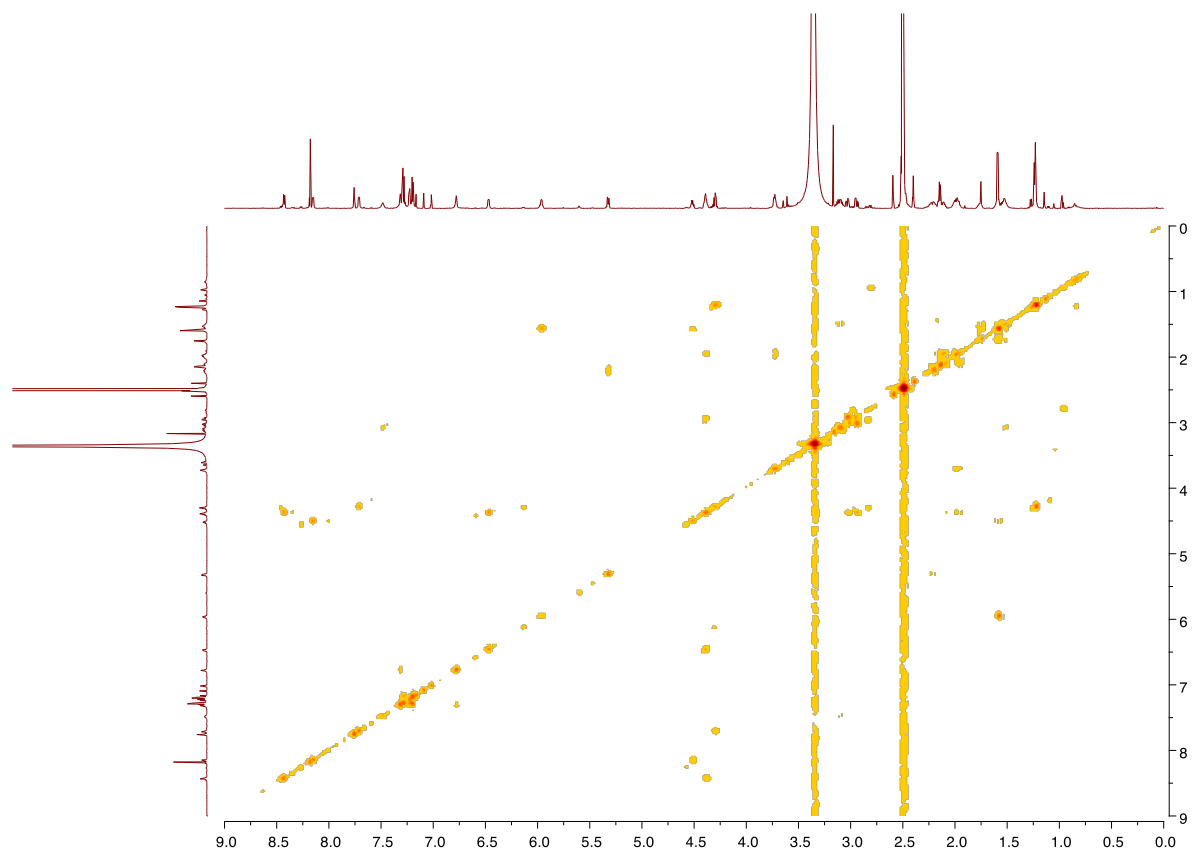

**Figure S29.** The  $^1\text{H}$ - $^1\text{H}$  COSY spectrum of **7** (700 MHz,  $\text{DMSO-}d_6$ ).



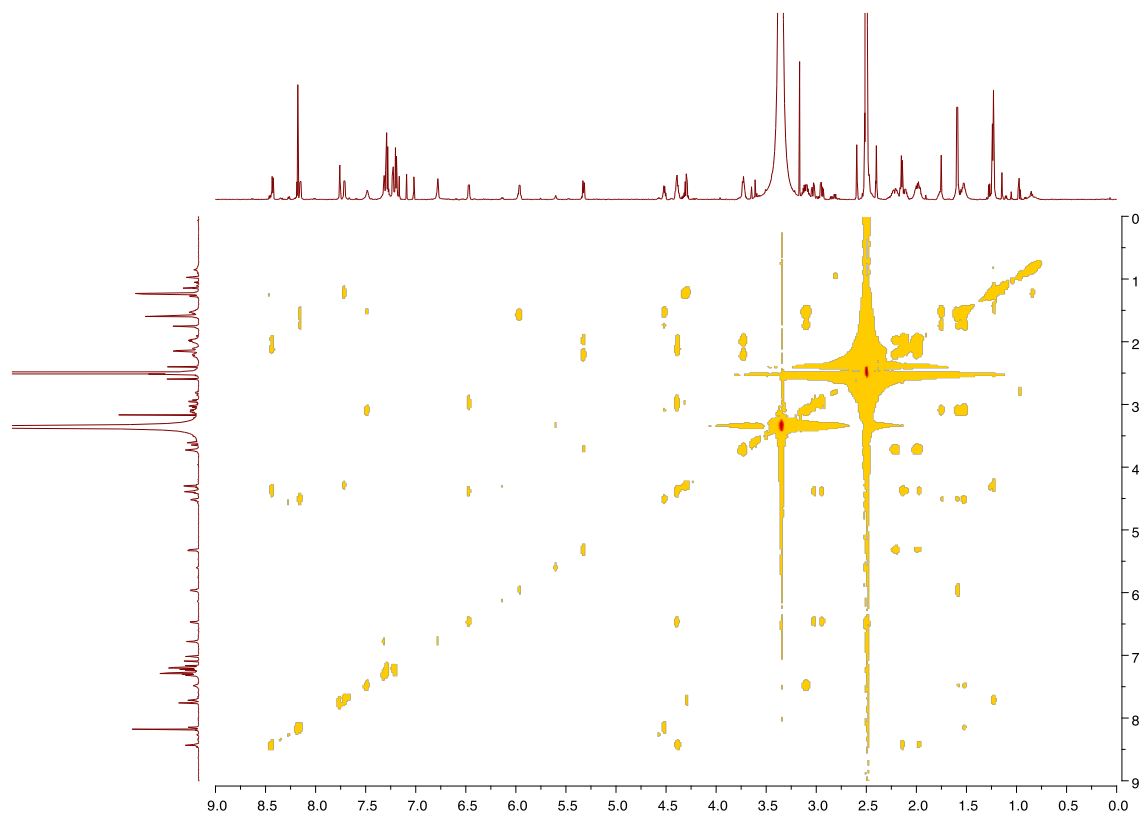

**Figure S30.** The TOCSY spectrum of **7** (700 MHz, DMSO-*d*<sub>6</sub>).

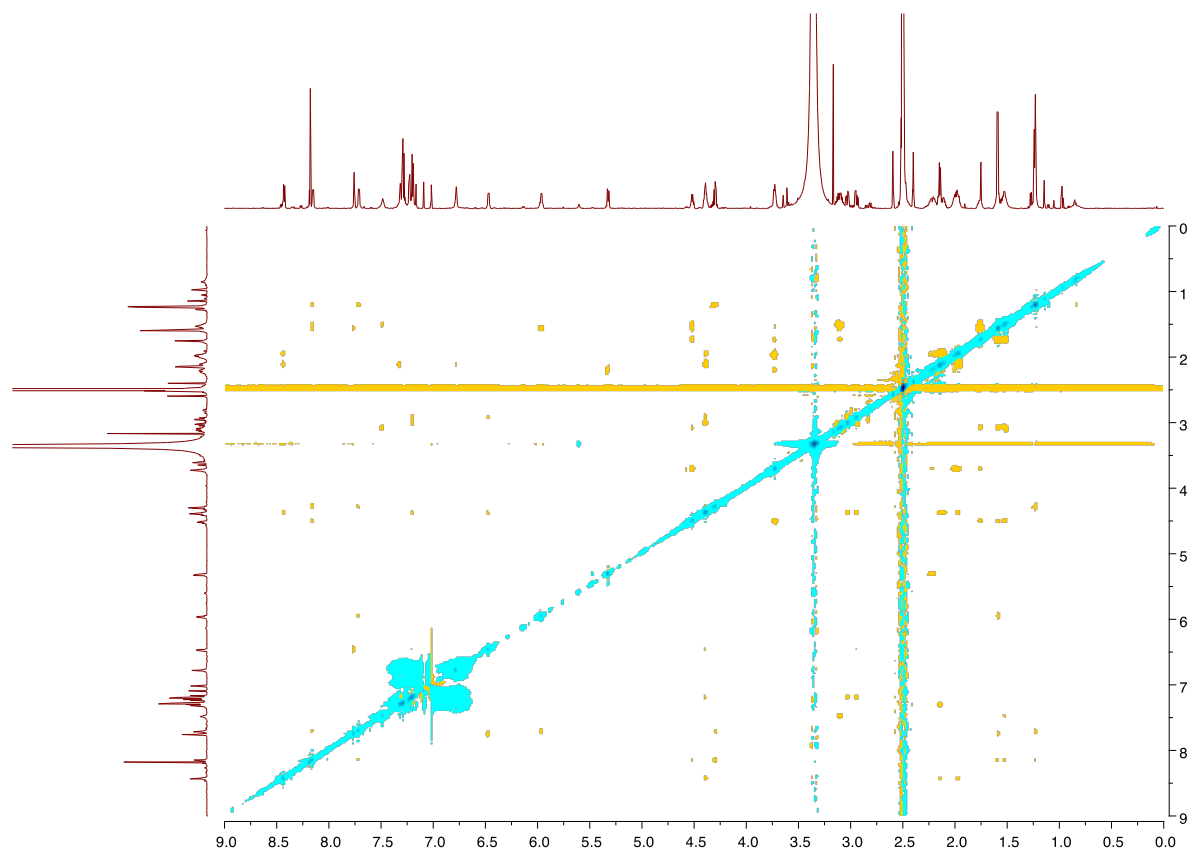

**Figure S31.** The ROESY spectrum of **7** (700 MHz, DMSO-*d*<sub>6</sub>).

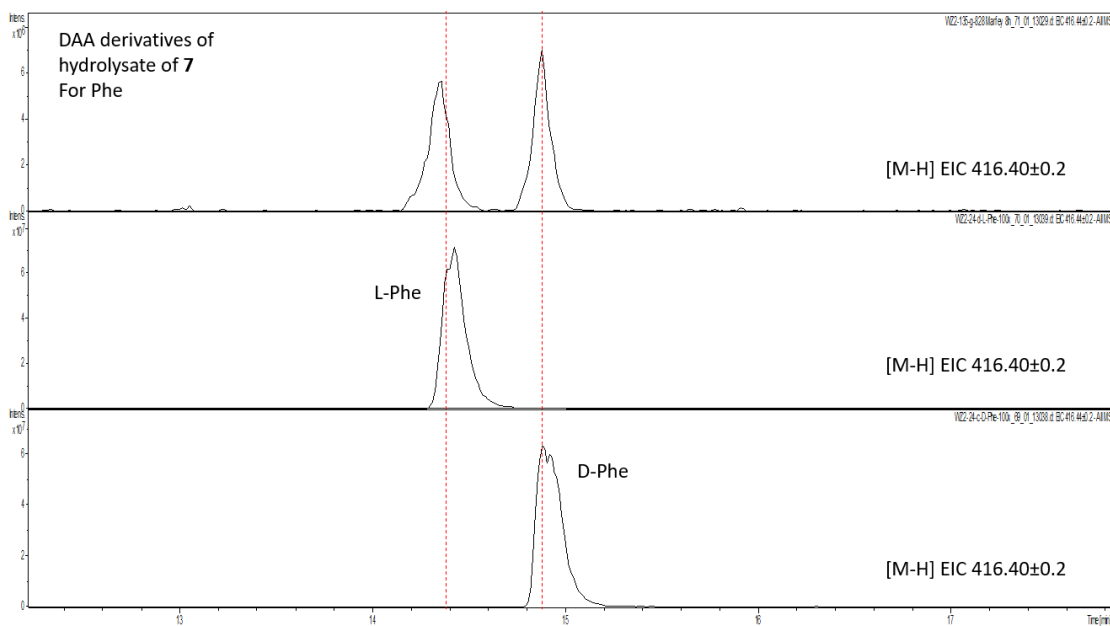

**Figure S32.** Marfey's analysis to determine the absolute configuration of the Phe residue in **7**. Extracted ion chromatograms (EICs) demonstrating the retention time of the DAA-derivatized Phe residue resulting from the acid hydrolysis of **7** (top), retention time of DAA-derivatized standard of L-Phe (middle), and the retention time of the similarly derivatized standard of D-Phe (bottom). Akin to **5**, the racemization of L-Phe in **7** took place.<sup>1</sup> Separation was achieved using the Agilent Poroshell EC-C18 (100×4.6 mm, 2.7 μm) column. Mass spectrometry data were acquired in the negative ionization mode.

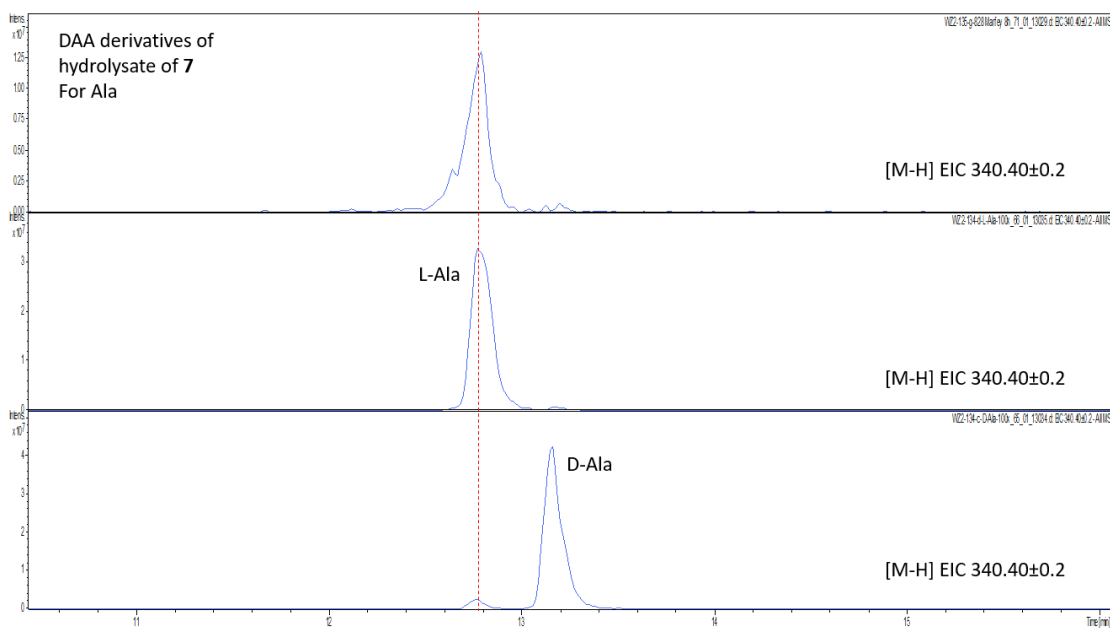

**Figure S33.** Marfey's analysis to determine the absolute configuration of the Ala residue in **7**. Extracted ion chromatograms (EICs) demonstrating the retention time of the DAA-derivatized Ala residue resulting from the acid hydrolysis of **7** (top), retention time of DAA-derivatized standard of L-Ala (middle), and the retention time of the similarly derivatized standard of D-Ala (bottom). By retention time matching, the Ala residue in **7** was determined to be L-Ala. Separation was achieved using the Agilent Poroshell EC-C18 (100×4.6 mm, 2.7 μm) column. Mass spectrometry data were acquired in the negative ionization mode.

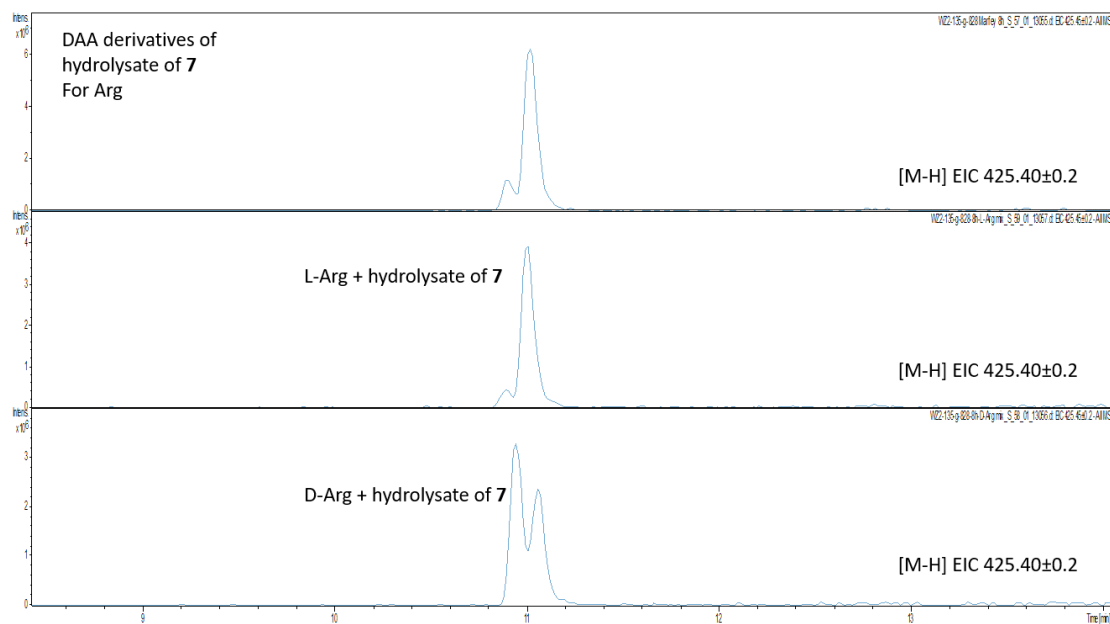

**Figure S34.** Marfey's analysis to determine the absolute configuration of the Arg residue in **7**. From top to bottom— EICs demonstrating retention time of DAA-derivitized Arg residue obtained by acid hydrolysis of **7**, DAA-derivitized standard for L-Arg spiked with the derivitized acid hydrolysate of **7**, and DAA-derivitized standard for D-Arg spiked with the derivitized acid hydrolysate of **7**. By retention time matching, the Arg residue in **7** was determined to be L-Arg. Separation was achieved using the Agilent Poroshell EC-C18 (100×4.6 mm, 2.7 μm) column. Mass spectrometry data were acquired in the negative ionization mode.

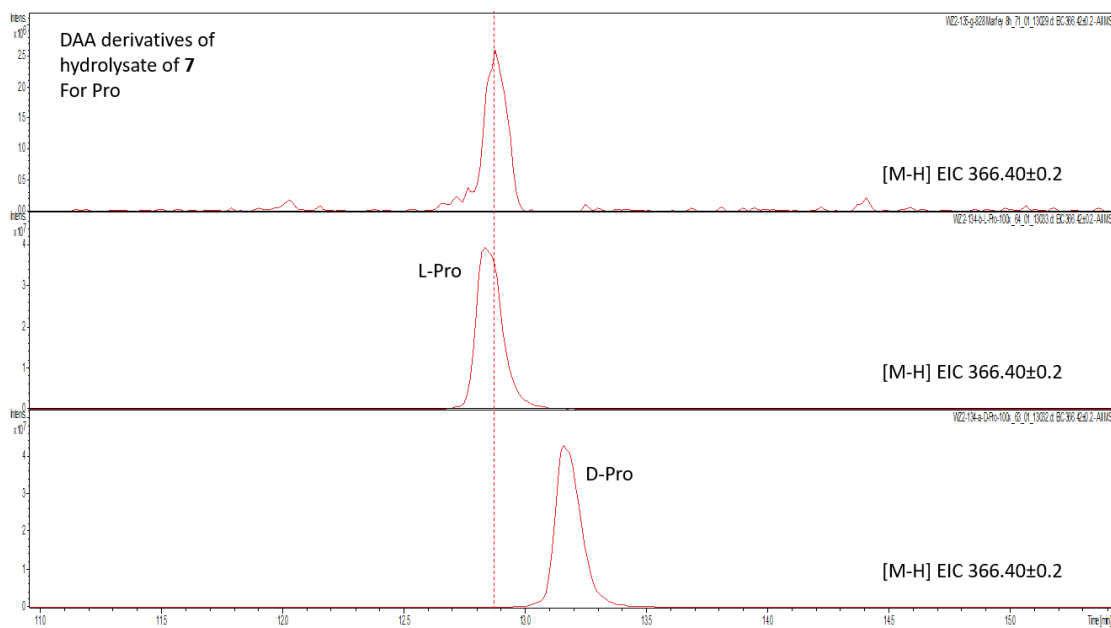

**Figure S35.** Marfey's analysis to determine the absolute configuration of the Pro residue in **7**. Extracted ion chromatograms (EICs) demonstrating the retention time of the DAA-derivatized Pro residue resulting from the acid hydrolysis of **7** (top), retention time of DAA-derivatized standard of L-Pro (middle), and the retention time of the similarly derivatized standard of D-Pro (bottom). By retention time matching, the Pro residue in **7** was determined to be L-Pro. Separation was achieved using the Agilent Poroshell EC-C18 (100×4.6 mm, 2.7 μm) column. Mass spectrometry data were acquired in the negative ionization mode.

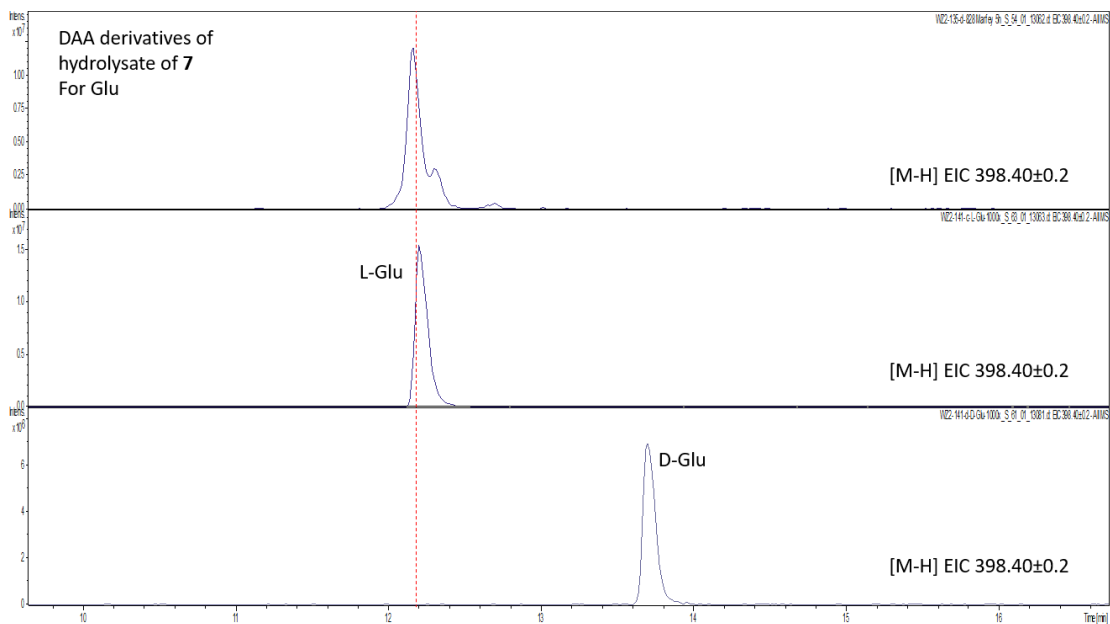

**Figure S36.** Marfey's analysis to determine the absolute configuration of the Gln residue in **7**. During acid hydrolysis, Gln is converted to Glu; hence, Glu standards are used here. Extracted ion chromatograms (EICs) demonstrating the retention time of the DAA-derivatized Glu residue resulting from the acid hydrolysis of **7** (top), retention time of DAA-derivatized standard of L-Glu (middle), and the retention time of the similarly derivatized standard of D-Glu (bottom). By retention time matching, the Gln residue in **7** was determined to be L-Gln. Separation was achieved using the Agilent Poroshell EC-C18 (100×4.6 mm, 2.7  $\mu$ m) column. Mass spectrometry data were acquired in the negative ionization mode.

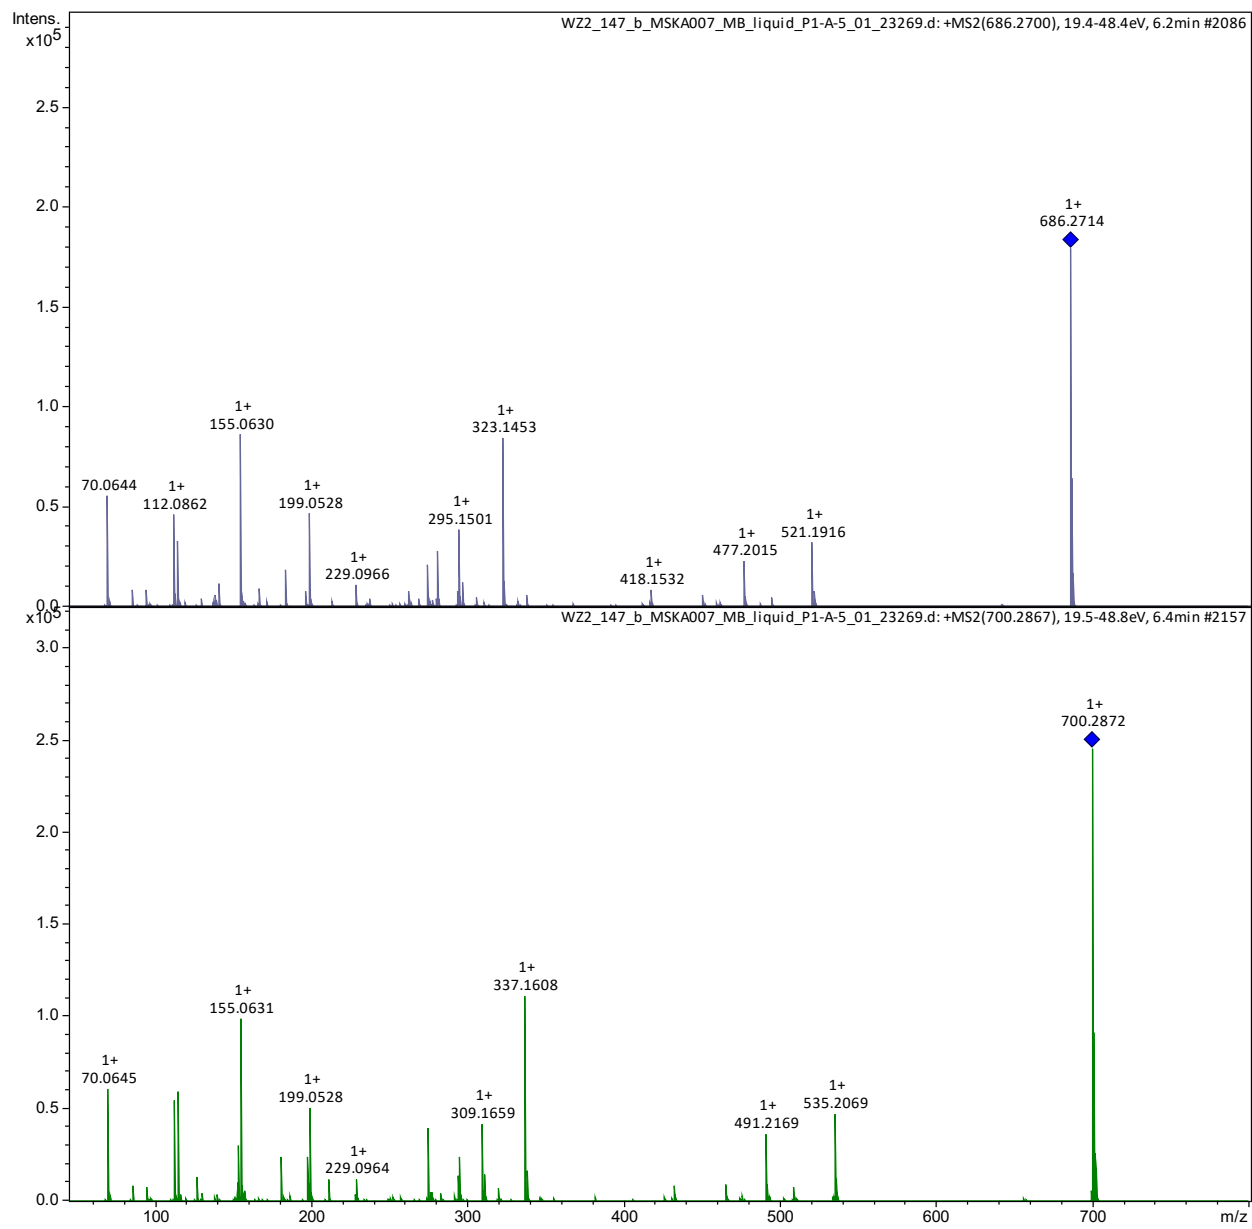

**Figure S37.** HRMS/MS spectra for **6** (top) and **8** (bottom).



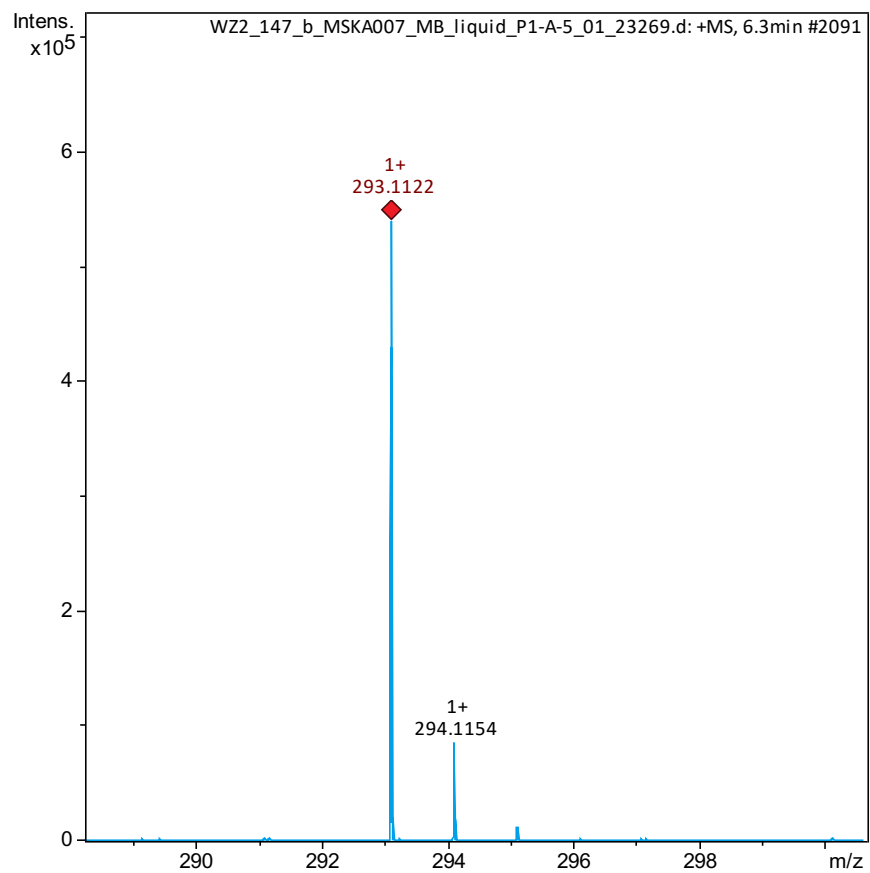

**Figure S38.** High resolution  $[M+H]^+$  MS<sup>1</sup> spectrum for **9**.

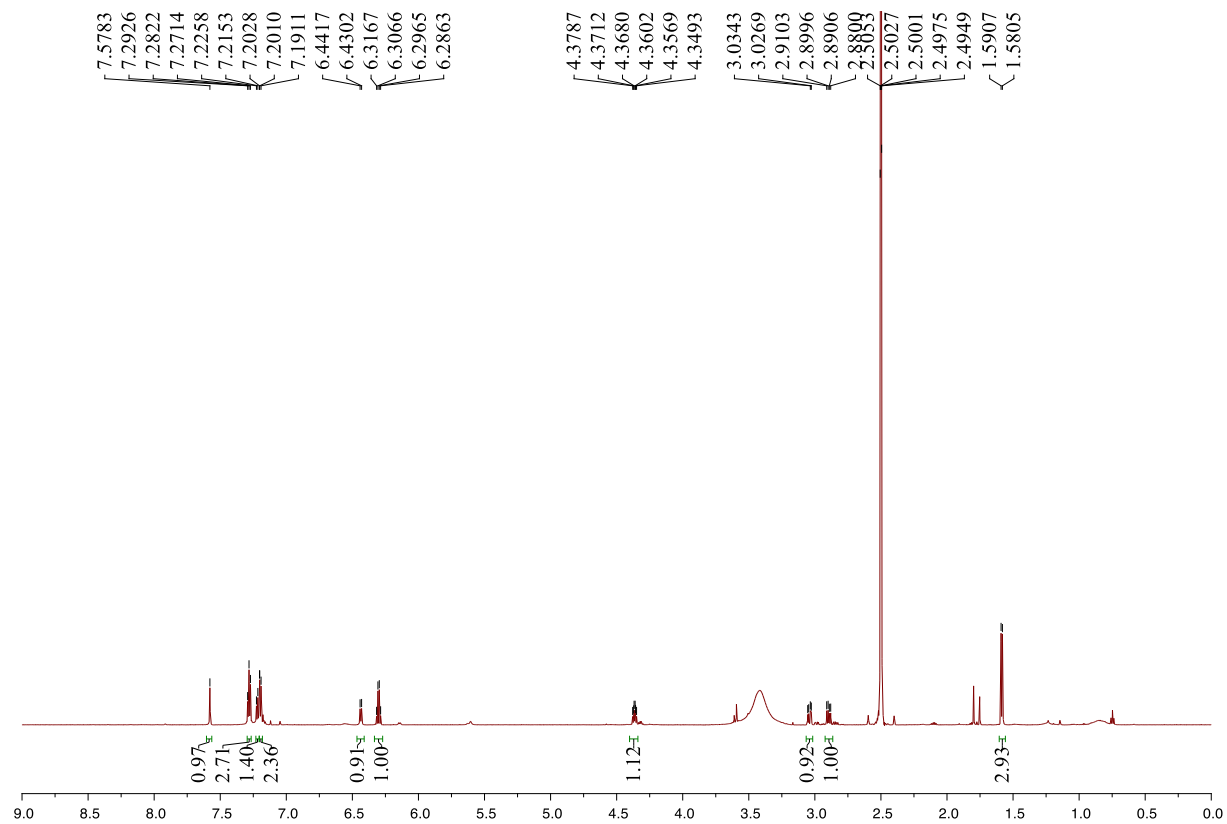

**Figure S39.** The  $^1\text{H}$  NMR spectrum of **9** (700 MHz,  $\text{DMSO-}d_6$ ).

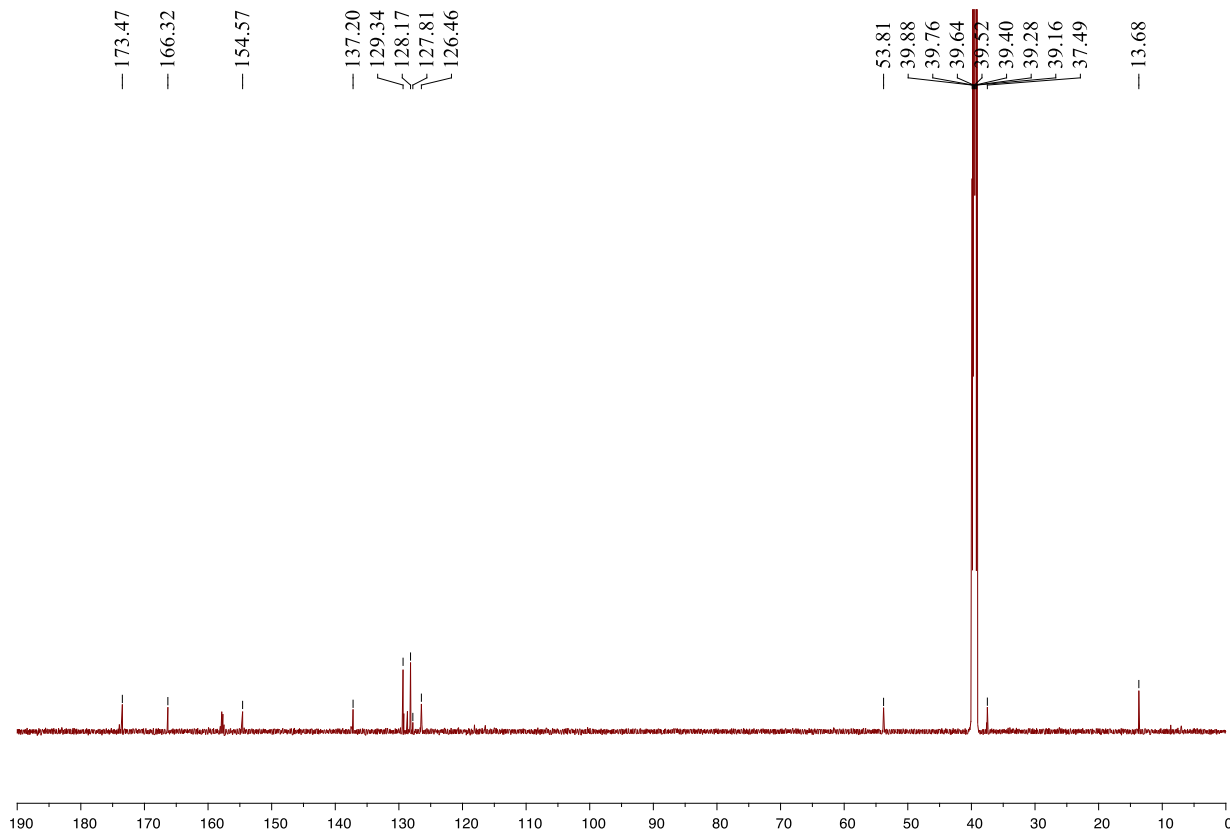

**Figure S40.** The  $^{13}\text{C}$  NMR spectrum of **9** (176 MHz,  $\text{DMSO-}d_6$ ).

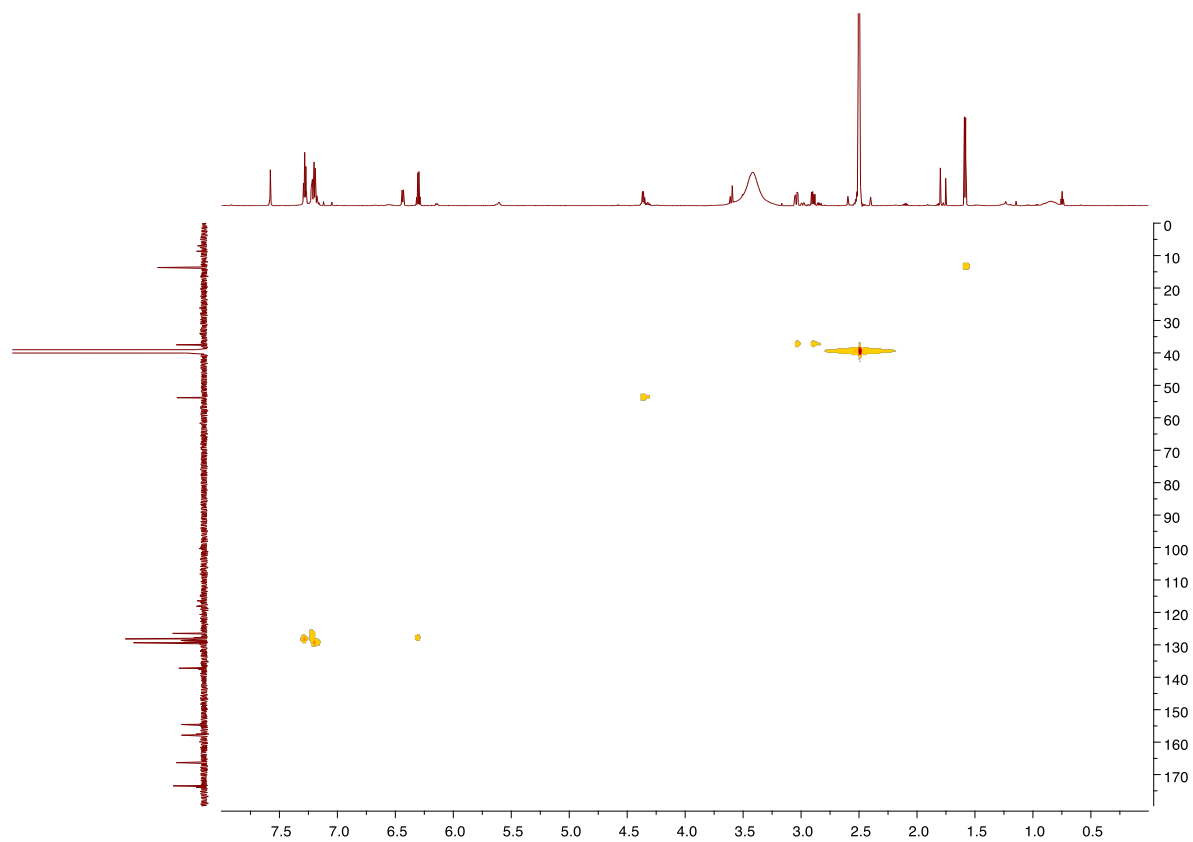

**Figure S41.** The HSQC spectrum of **9** (700 MHz, DMSO-*d*<sub>6</sub>).

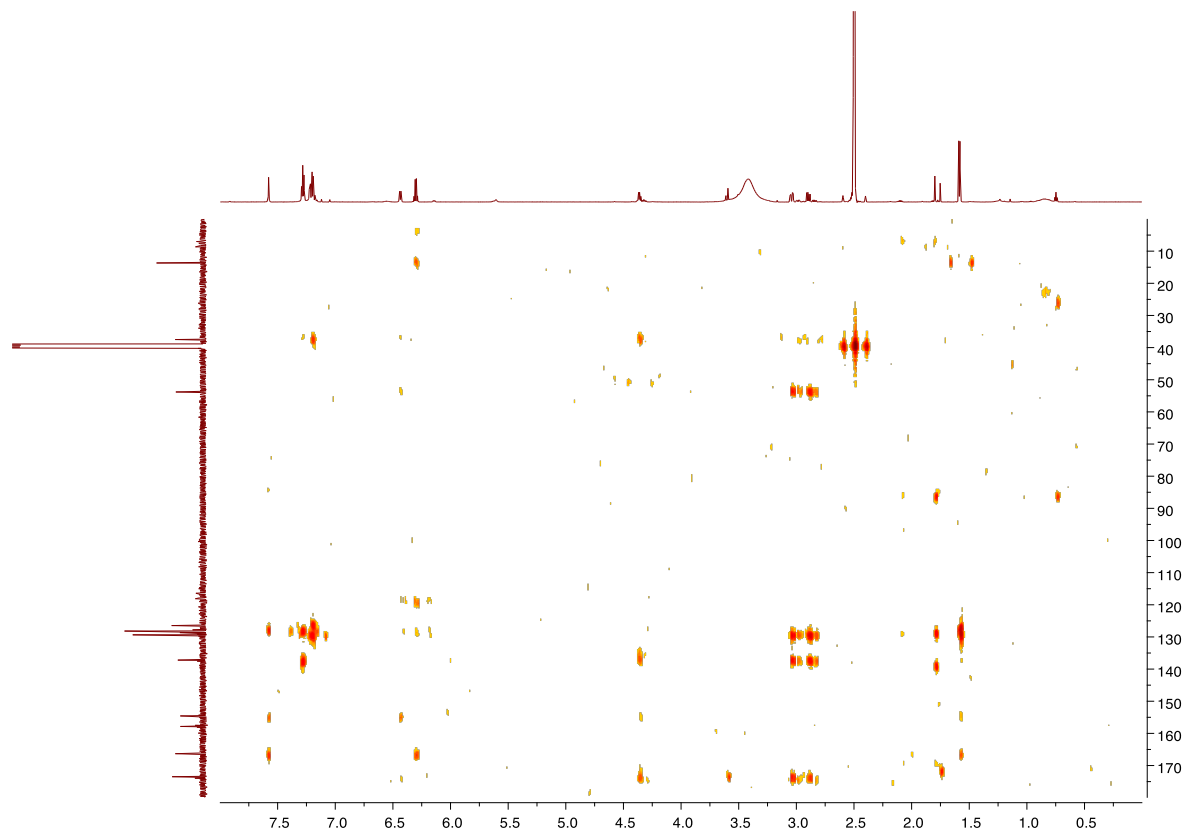

**Figure S42.** The HMBC spectrum of **9** (700 MHz, DMSO-*d*<sub>6</sub>).

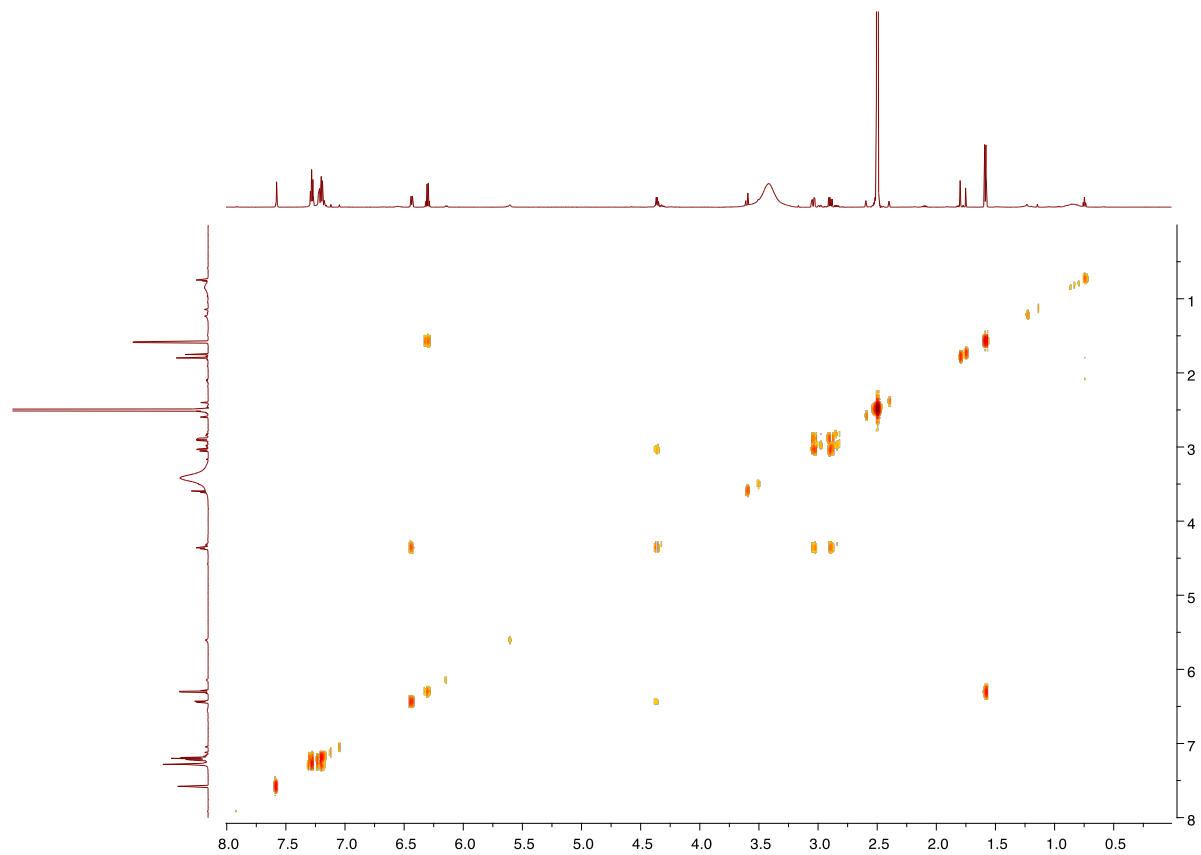

**Figure S43.** The  $^1\text{H}$ - $^1\text{H}$  COSY spectrum of **9** (700 MHz,  $\text{DMSO-}d_6$ ).

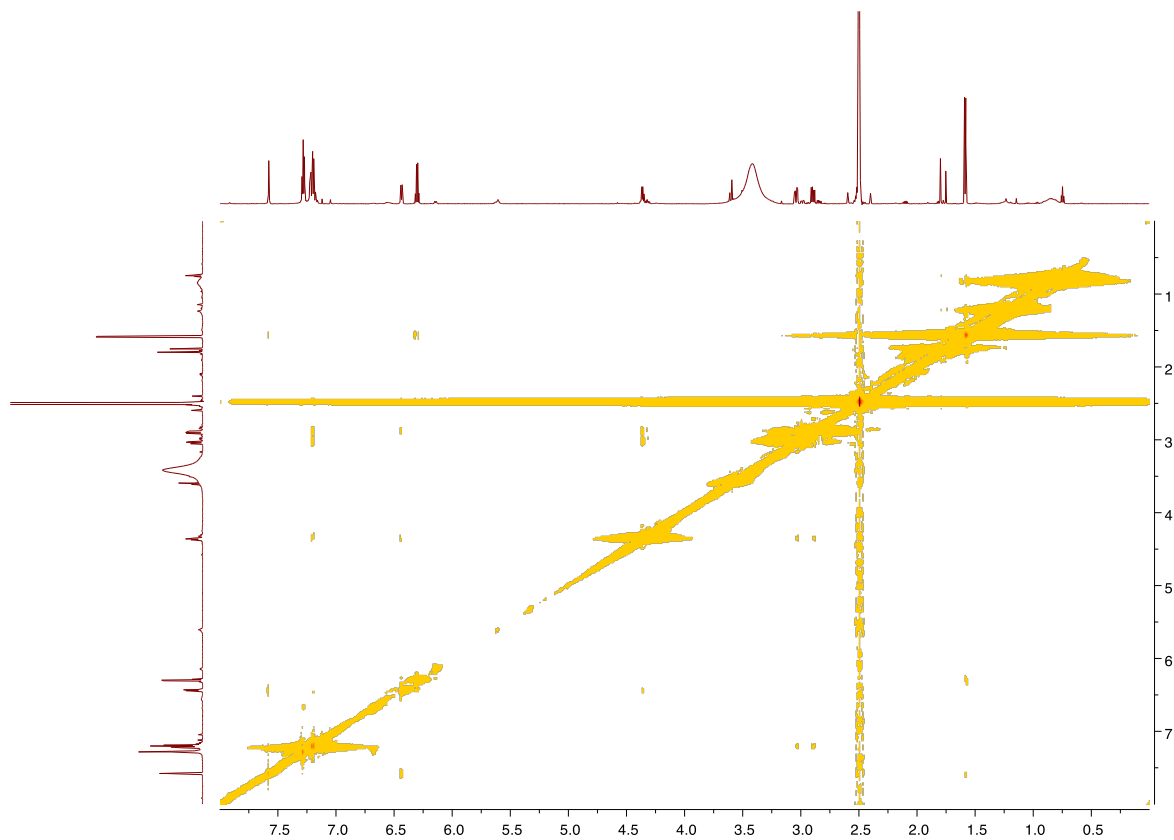

**Figure S44.** The ROESY spectrum of **9** (700 MHz, DMSO-*d*<sub>6</sub>).

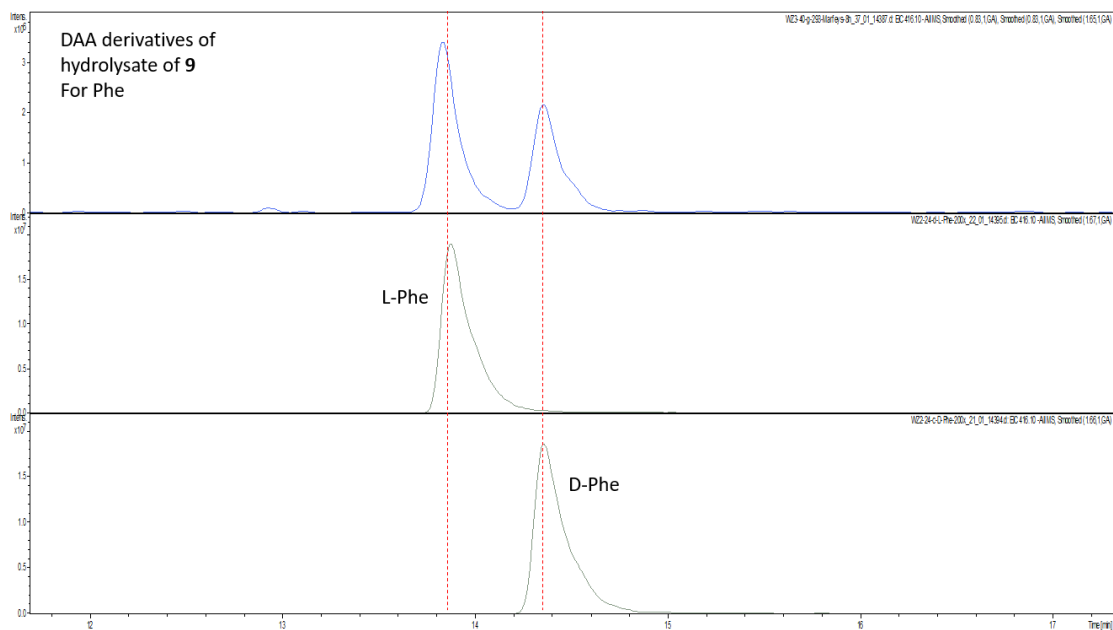

**Figure S45.** Marfey's analysis to determine the absolute configuration of the Phe residue in **9**. Extracted ion chromatograms (EICs) demonstrating the retention time of the DAA-derivatized Phe residue resulting from the acid hydrolysis of **9** (top), retention time of DAA-derivatized standard of L-Phe (middle), and the retention time of the DAA-derivatized standard of D-Phe (bottom). Akin to **5** and **7**, the racemization of L-Phe in **9** took place.<sup>1</sup> Separation was achieved using the Agilent Poroshell EC-C18 (100×4.6 mm, 2.7  $\mu$ m) column. Mass spectrometry data were acquired in the negative ionization mode.



#### SUPPLEMENTARY REFERENCES

- (1) Kanki, D.; Nakamukai, S.; Ogura, Y.; Takikawa, H.; Ise, Y.; Morii, Y.; Yamawaki, N.; Takatani, T.; Arakawa, O.; Okada, S.; Matsunaga, S. *J Nat Prod* **2021**, *84*, 1848.
